# Supplementary material for: Photoluminescence enhancement induced by a halide anion encapsulation in a series of novel lanthanide(iii) coordination polymers
Source: Royal Society of Chemistry journal article supplement (doi:10.1039/c5ce01901j), 2015-12-30
Supplement: c5ce01901j1.pdf [file c5ce01901j1.pdf]

*Supplementary Information of*

**Photoluminescence Enhancement Induced by a Halide Anion Encapsulation in a Series of Novel Lanthanide(III) Coordination Polymers**

Cong Xu<sup>a</sup>, Alexander M. Kirillov<sup>b</sup>, Yubo Shu<sup>a</sup>, Yan Liu<sup>a</sup>, Lirong Guo<sup>a</sup>, Lizi Yang<sup>a</sup>, Wei Dou<sup>a</sup>, Wei Liu<sup>a</sup>, Chunyang Chen<sup>a</sup>, Xin Huang<sup>a</sup>, Jiayao Zhang<sup>a</sup>, and Weisheng Liu<sup>a\*</sup>

- a. Key Laboratory of Nonferrous Metals Chemistry and Resources Utilization of Gansu Province and State Key Laboratory of Applied Organic Chemistry, College of Chemistry and Chemical Engineering, Lanzhou University, Lanzhou 730000, P. R. China
- b. Centro de Química Estrutural, Complexo I, Instituto Superior Técnico, Universidade de Lisboa, Av. Rovisco Pais, 1049-001, Lisbon, Portugal.

**Content**

1. Experimental details of anion exchange studies. Emission spectra of **1** before and after anion exchange experiments. **Figure SI1.**
2. Phosphorescence spectra of compounds **7-9**. **Figure SI2.**
3. Absorption spectrum of the complex **7-9** in DMSO solution. **Figure SI3.**
4. Additional structural representations of **1** and **6**. **Figure SI4.**
5. Emission spectra of compounds **10**. **Figure SI5.**
6. The ICP analysis of compounds **10**. **Table SI1.**
7.  $I_{\text{tot}}/I_{\text{MD}}$  calculation for compounds **1-3**. **Table SI2-4.**
8. Thermogravimetric analysis curves of compounds **1-9**. **Figure SI6**
9. IR spectra of compounds **1-9**. **Figure SI7.**
10. IR spectra of compounds **10**. **Figure SI8.**
11. PXRD patterns of **1-9** and the corresponding simulated data. **Figure SI9.**
12. The angle  $\angle \text{C}_8\text{Eu}_1\text{C}_{25}$  of compound **1-3**. **Figure SI10.**
13. PXRD spectrum of **1** in anions exchange experiment. **Figure SI11.**
14. IR spectrum of **1** in anions exchange experiment. **Figure SI12.**
15. Selected bond length and bond angle data of compound **1-9**. **Table SI5.**
16. The hydrogen bond data of compound **1-9**. **Table SI6.**

**Experimental details of anion exchange studies.** The pseudohalogen anions exchange experiments by the metal-organic network of compound **1** were undertaken as follows: 15 mg of compound **1**, 2 mL of DMF and 1 mL of aqueous solution containing a pseudohalogen ( $\text{CN}^-$ ,  $\text{SCN}^-$  or  $\text{N}_3^-$  with the concentration of  $10^{-3}$  mol/L) or halogen ( $\text{Br}^-$  or  $\text{I}^-$  with the concentration of  $10^{-1}$ ,  $10^{-3}$ ,  $10^{-5}$  mol/L) ions in a form of sodium salts were placed in the 20 mL vial. The obtained suspension was treated ultrasonically for 30 min and then heated to  $90^\circ\text{C}$  for 72 h. The obtained samples were in a form of a turbid liquid with a pale yellow solid. They were cooled to room temperature and their luminescent spectra were run with the slit width of 5 mm at room temperature on a Hitachi F-7000 spectrophotometer.

Based on the test of IR (Figure SII2), the  $\text{N}_3^-$  anion main peak  $2140\text{-}2030\text{cm}^{-1}$ , the  $\text{CN}^-$  anion main peak  $2140\text{-}2080\text{cm}^{-1}$  and  $\text{SCN}^-$  main peak  $1900\text{cm}^{-1}$  cannot be observed. This proves that the outside pseudohalogen anions cannot exchange the halogen anions inside. The PXRD test (Figure SII1) demonstrate that the framework of **1** have not affected by the experiment conditions.

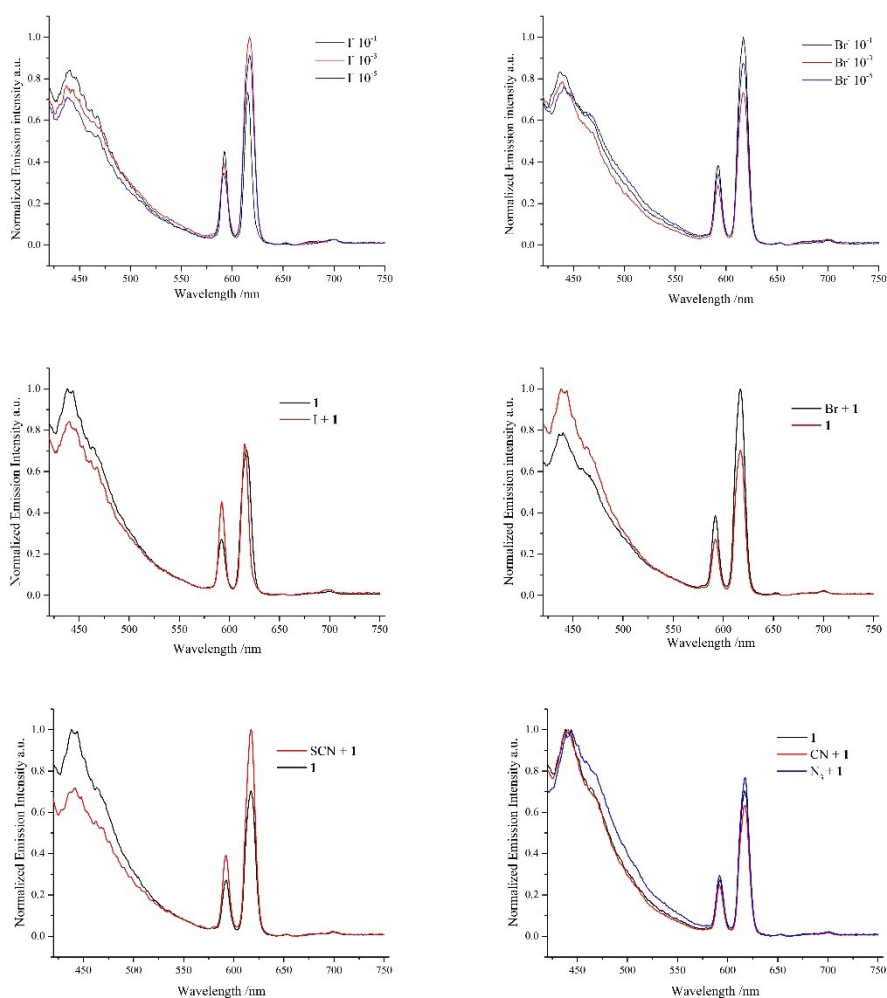

**Figure SII.** The emission spectra of **1** before and after anion exchange experiments.

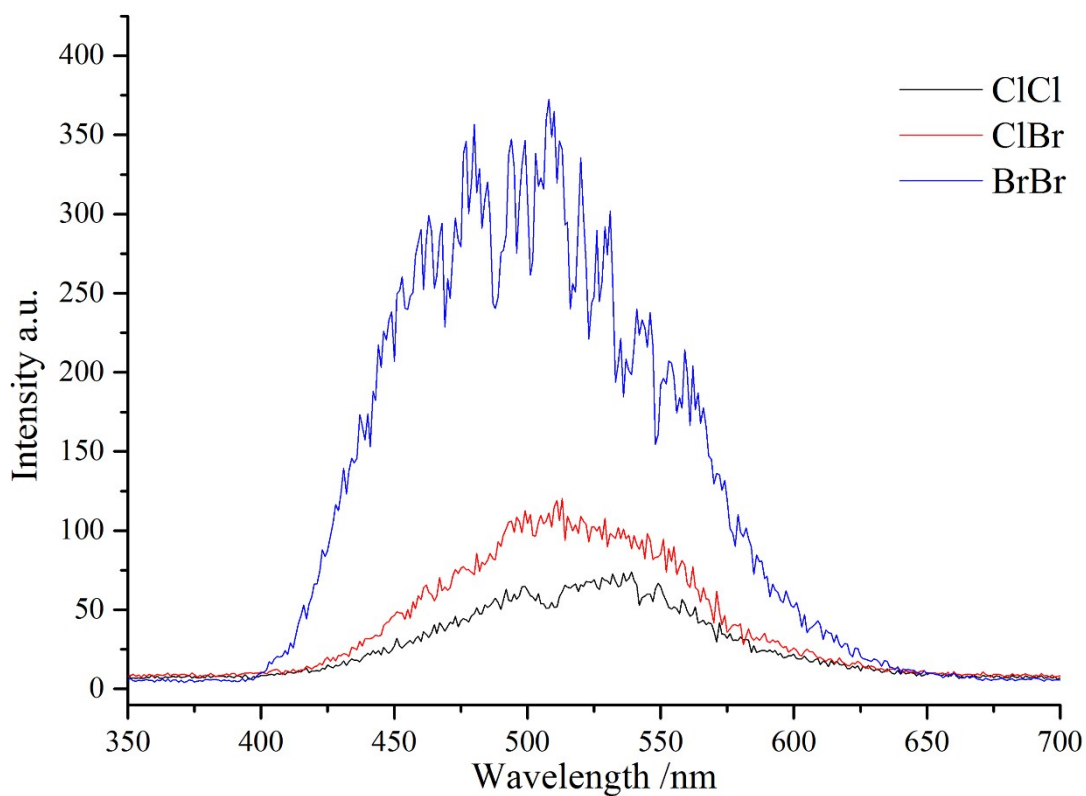

**Figure S12.** The phosphorescence spectra of compounds 7-9.

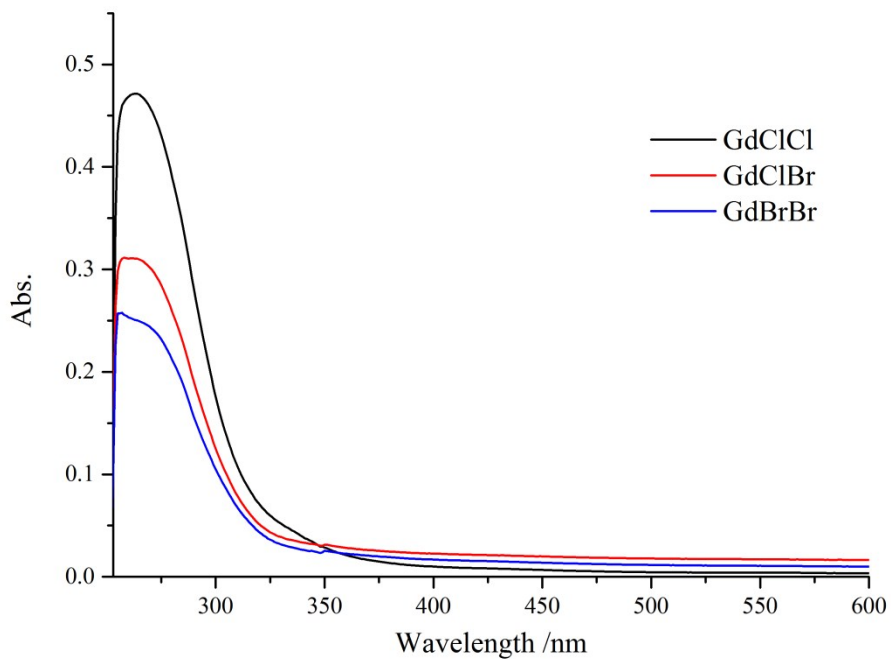

**Figure S13.** Absorption spectrum of the complex 7-9 in DMSO solution.

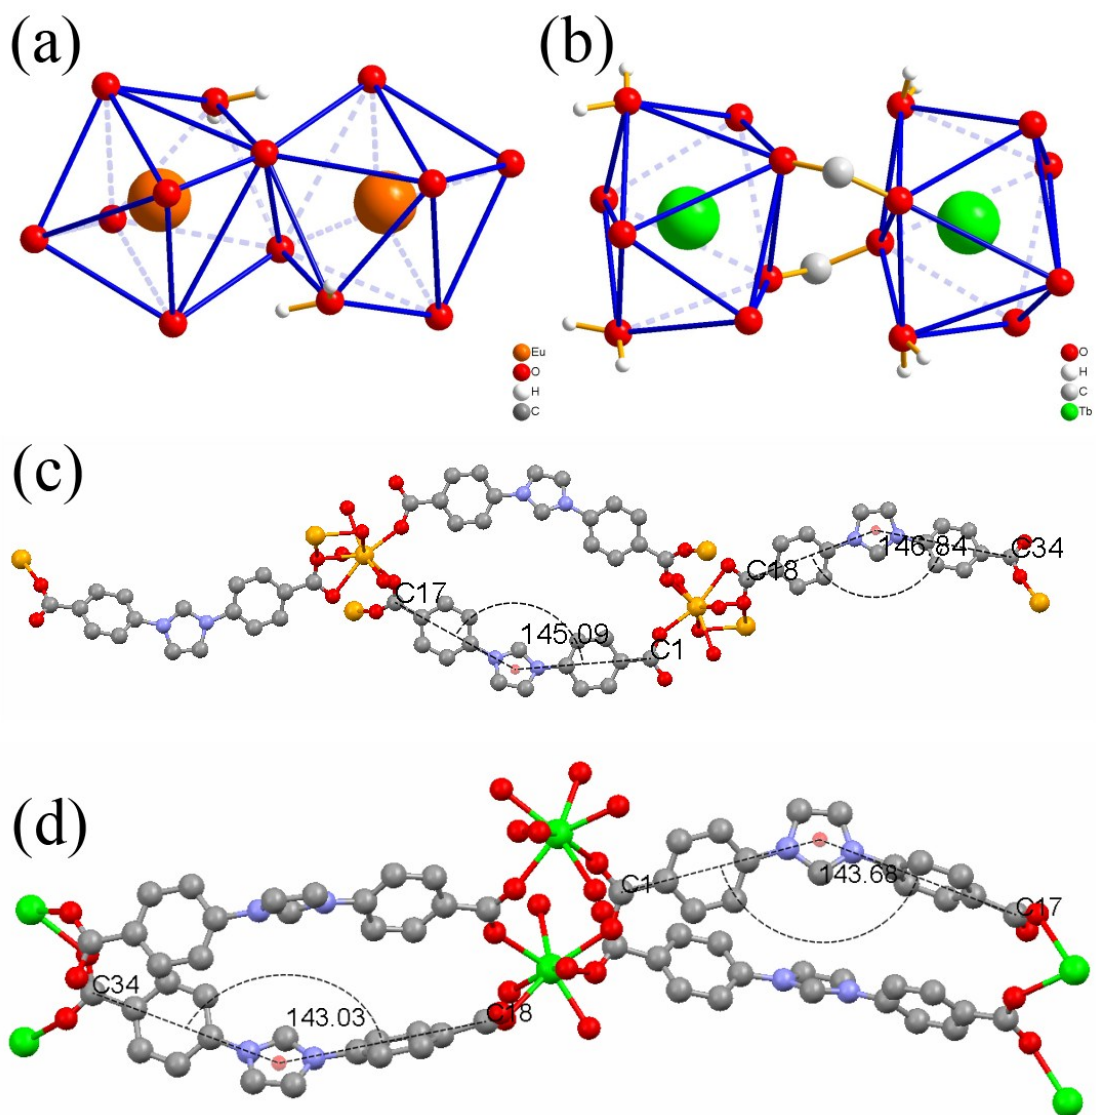

**Figure SI4.** (a) The coordination geometry of the  $\text{Eu}_2$  unit in **1**. (b) The coordination geometry of Tb centres in **6**. (c) The angle data of Bcpi in **1**. (d) The angle data of Bcpi in **6**.

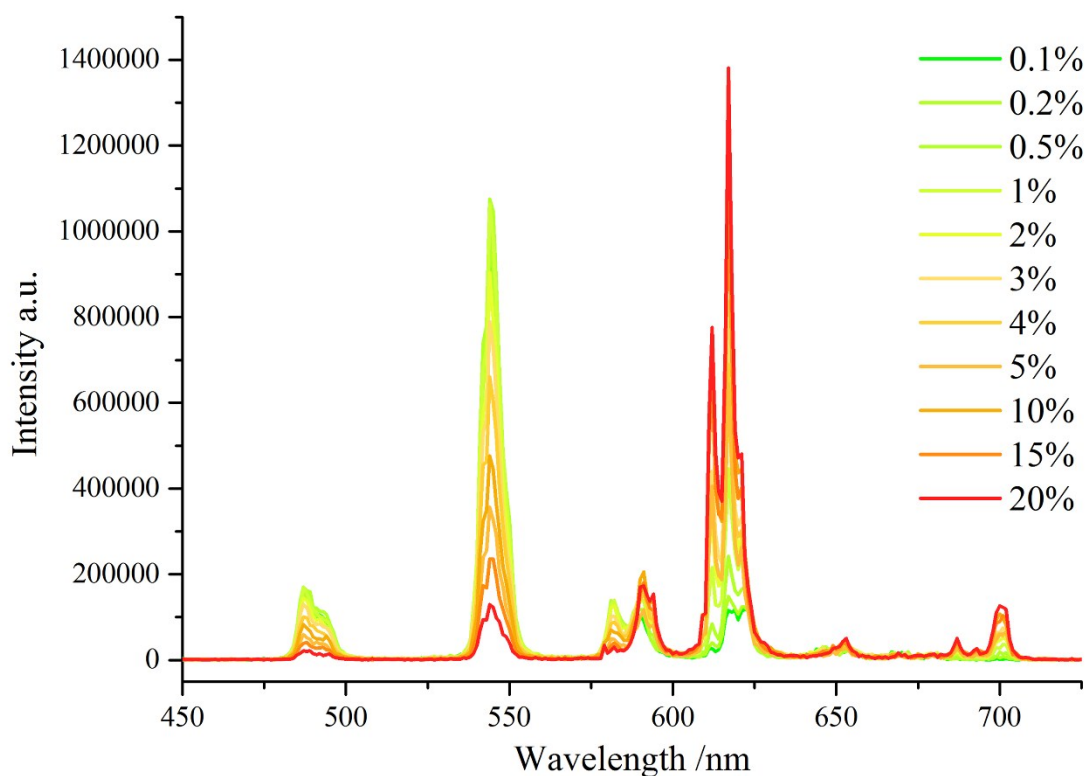

**Figure S15.** The emission spectra of compounds  $\{[\text{Tb}_{1-x}\text{Eu}_x(\text{Bcpi})_2(\text{H}_2\text{O})]\text{Cl}\cdot(\text{H}_2\text{O})\}_n$  (**10**) with a different content of Eu/Tb. The content of  $\text{TbCl}_3$  was initially fixed and calculated as 100%.

**Table S11.** The molar ratio of the starting Tb/Eu salt and that in  $\{[\text{Tb}_{1-x}\text{Eu}_x(\text{Bcpi})_2(\text{H}_2\text{O})]\text{Cl}\cdot(\text{H}_2\text{O})\}_n$  (**10**) calculated by ICP analysis.

| Sample                                          | The molar ratio of the starting |                                             |
|-------------------------------------------------|---------------------------------|---------------------------------------------|
|                                                 | Tb/Eu salt                      | the Tb/Eu ratios calculated by ICP analysis |
| $\text{Tb}_{0.999}\text{Eu}_{0.001}\text{Bcpi}$ | 1:0.001                         | 1:0.0009                                    |
| $\text{Tb}_{0.998}\text{Eu}_{0.002}\text{Bcpi}$ | 1:0.002                         | 1:0.0018                                    |
| $\text{Tb}_{0.995}\text{Eu}_{0.005}\text{Bcpi}$ | 1:0.005                         | 1:0.0052                                    |
| $\text{Tb}_{0.99}\text{Eu}_{0.01}\text{Bcpi}$   | 1:0.01                          | 1:0.0091                                    |
| $\text{Tb}_{0.98}\text{Eu}_{0.02}\text{Bcpi}$   | 1:0.02                          | 1:0.0192                                    |
| $\text{Tb}_{0.97}\text{Eu}_{0.03}\text{Bcpi}$   | 1:0.03                          | 1:0.0309                                    |
| $\text{Tb}_{0.95}\text{Eu}_{0.05}\text{Bcpi}$   | 1:0.05                          | 1:0.0494                                    |
| $\text{Tb}_{0.90}\text{Eu}_{0.10}\text{Bcpi}$   | 1:0.10                          | 1:0.0974                                    |
| $\text{Tb}_{0.85}\text{Eu}_{0.15}\text{Bcpi}$   | 1:0.15                          | 1:0.1449                                    |
| $\text{Tb}_{0.80}\text{Eu}_{0.20}\text{Bcpi}$   | 1:0.20                          | 1:0.2046                                    |

**Table SI2.** The  $I_{\text{tot}}/I_{\text{MD}}$  calculation for compound **1**.

| Integral ranges   | Transitions | Integral intensities | Integral ratio | $I_{\text{tot}}/I_{\text{MD}}$ |
|-------------------|-------------|----------------------|----------------|--------------------------------|
| 577-581 nm        | J = 0       | 26453                | 0.005912331    | 169.138                        |
| 583-603 nm        | J = 1       | 456161.5             | 0.101953573    | 9.808386                       |
| 605-638 nm        | J = 2       | 3020533.5            | 0.675099019    | 1.481264                       |
| 647-657 nm        | J = 3       | 106550.5             | 0.023814382    | 41.99143                       |
| 666-715 nm        | J = 4       | 772770.1             | 0.17271662     | 5.789831                       |
| Total integration |             | 4474208.1            |                |                                |

**Table SI3.** The  $I_{\text{tot}}/I_{\text{MD}}$  calculation for compound **2**.

| Integral ranges   | Transitions | Integral intensities | Integral ratio | $I_{\text{tot}}/I_{\text{MD}}$ |
|-------------------|-------------|----------------------|----------------|--------------------------------|
| 577-581 nm        | J = 0       | 25527.5              | 0.002639086    | 378.9190677                    |
| 583-603 nm        | J = 1       | 931377.5             | 0.096287741    | 10.38553809                    |
| 605-638 nm        | J = 2       | 6689843              | 0.691609867    | 1.445901869                    |
| 647-657 nm        | J = 3       | 204966               | 0.021189811    | 47.1924929                     |
| 666-715 nm        | J = 4       | 1682659.5            | 0.173956835    | 5.748552515                    |
| Total integration |             | 9672856.5            |                |                                |

**Table SI4.** The  $I_{\text{tot}}/I_{\text{MD}}$  calculation for compound **3**.

| Integral ranges | Transitions | Integral intensities | Integral ratio | $I_{\text{tot}}/I_{\text{MD}}$ |
|-----------------|-------------|----------------------|----------------|--------------------------------|
| 577-581 nm      | J = 0       | 42597.5              | 0.003862225    | 258.9181                       |
| 583-603 nm      | J = 1       | 1221860              | 0.110783468    | 9.026618                       |
| 605-638 nm      | J = 2       | 7155164.5            | 0.648743665    | 1.541441                       |
| 647-657 nm      | J = 3       | 193771               | 0.017568808    | 56.91906                       |
| 666-715 nm      | J = 4       | 2260561.5            | 0.204960341    | 4.878993                       |
| 577-715         |             | 11029263             |                |                                |

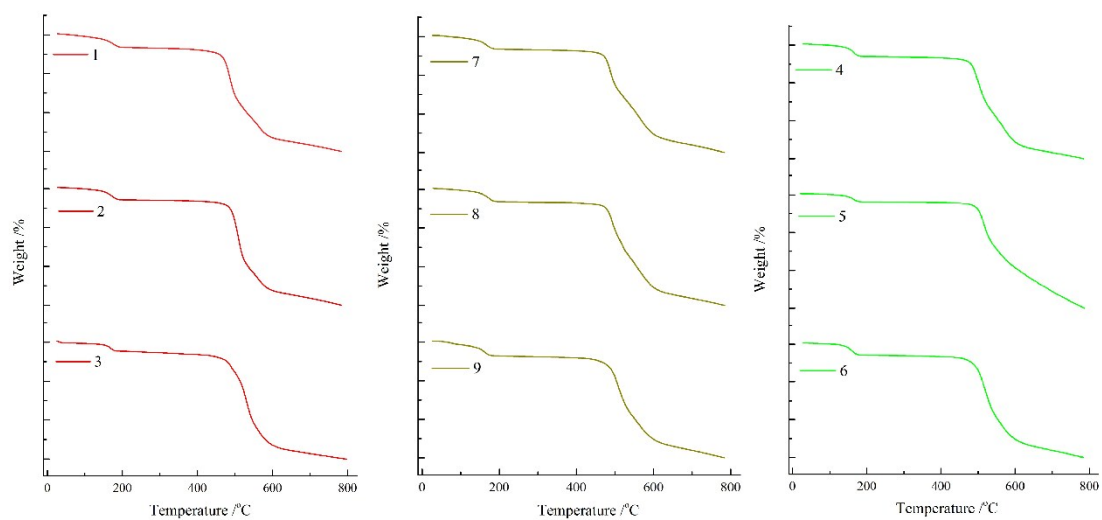

**Figure S16.** The TG curves of coordination polymers **1–9**: Eu-CP (a), Tb-CPs (b) and Gd-CPs (c).

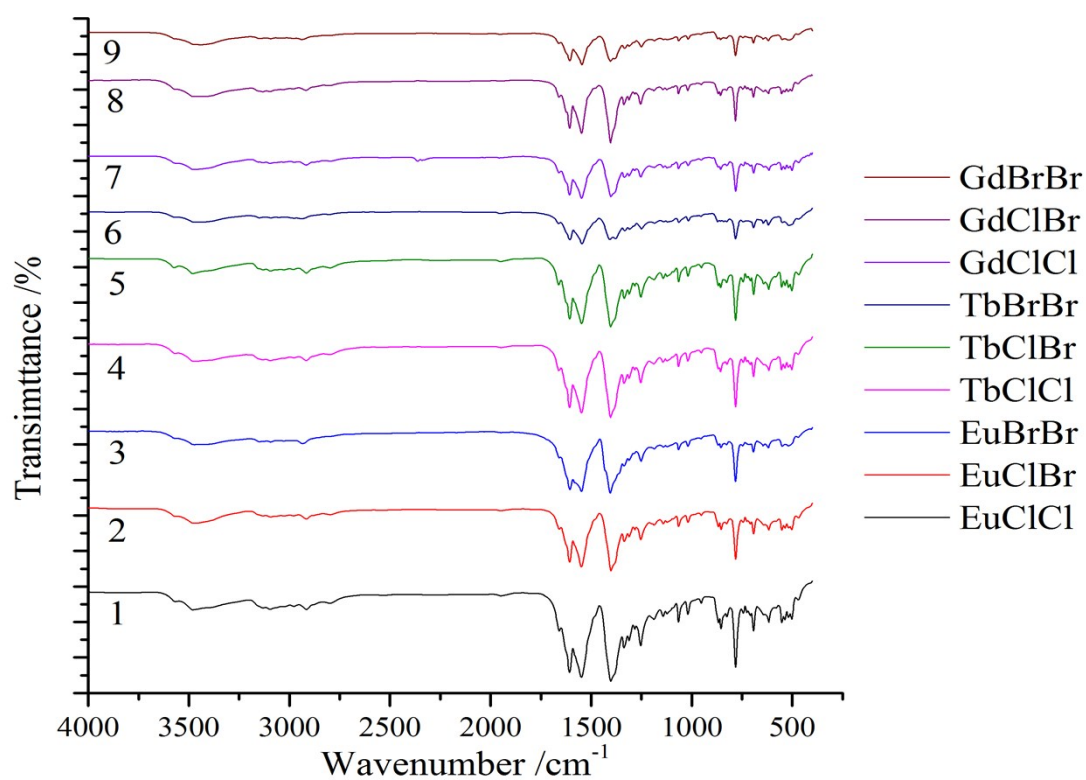

**Figure S17.** The IR spectra of compounds **1–9**.

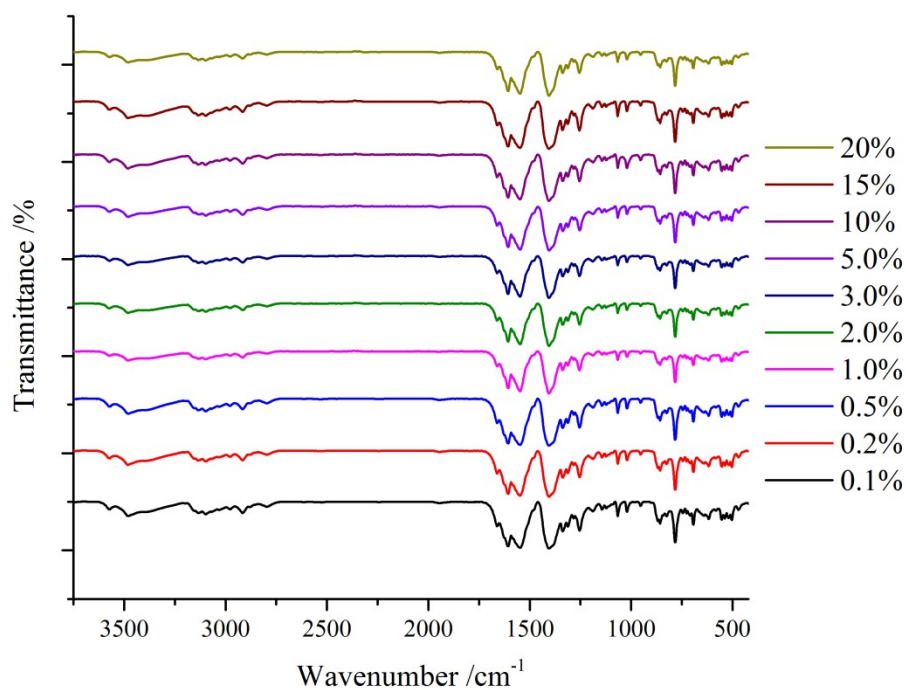

**Figure SI8.** The IR spectra of compounds **10**.

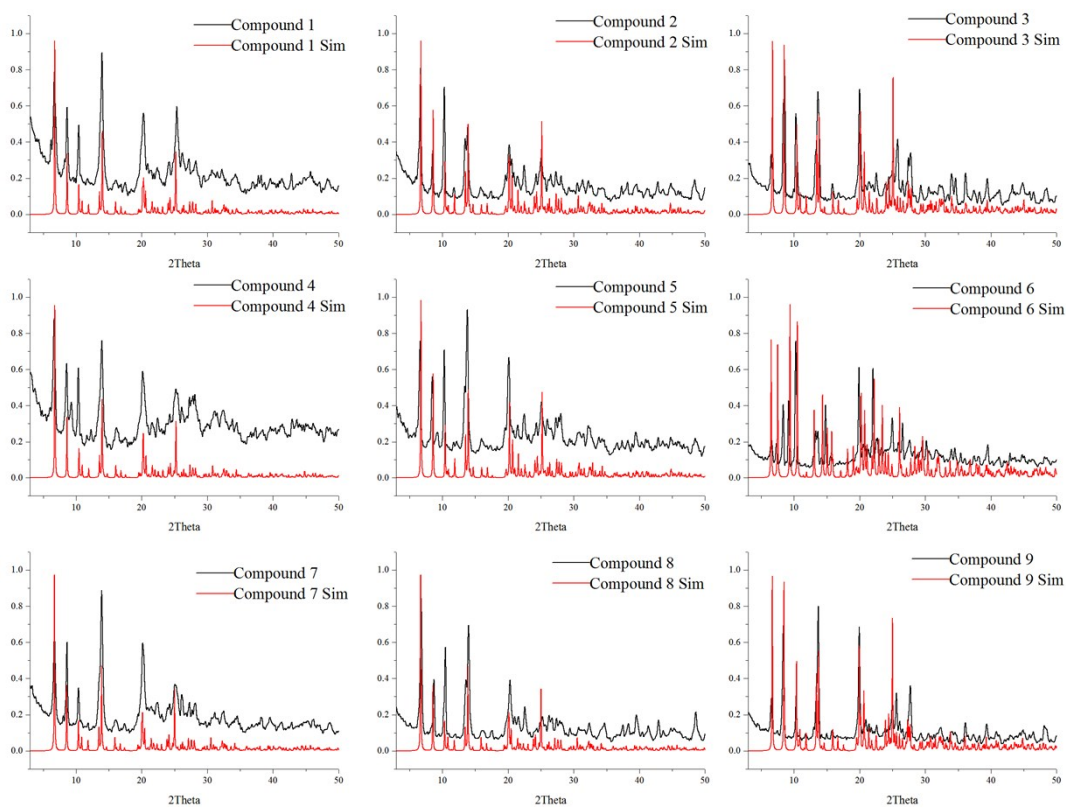

**Figure SI9.** Powder-XRD analysis of compounds **1-9**. Experimental (black lines), calculated (red lines).



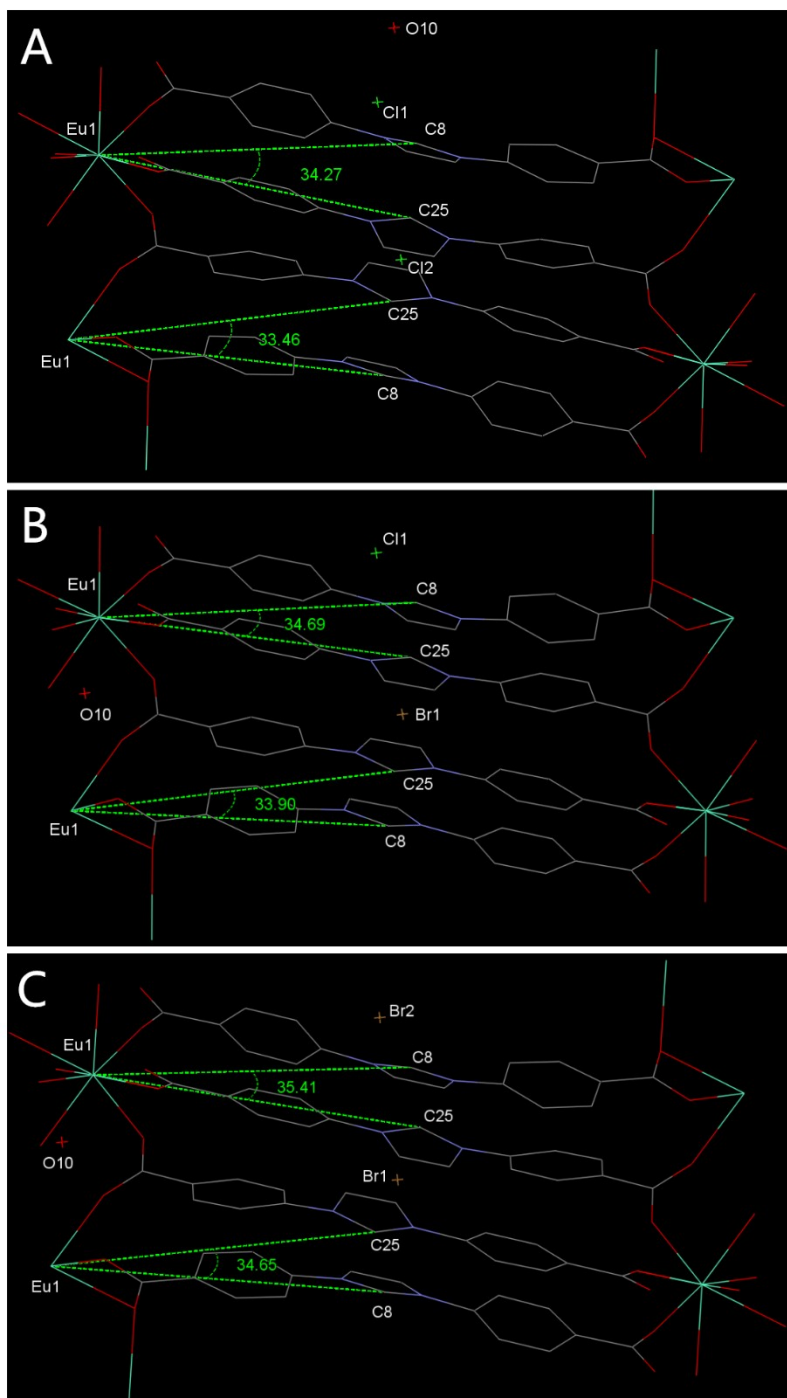

**Figure SI10.** The angle  $\angle C_8Eu_1C_{25}$  of compound **1-3**.

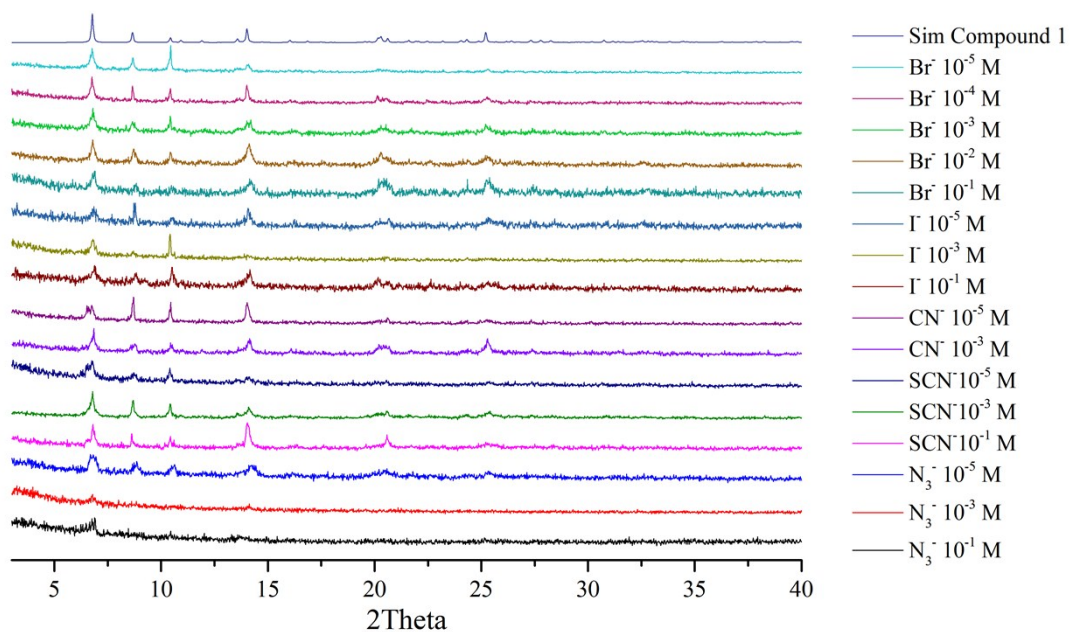

**Figure SI11.** PXRD spectrum of **1** in anions exchange experiment.

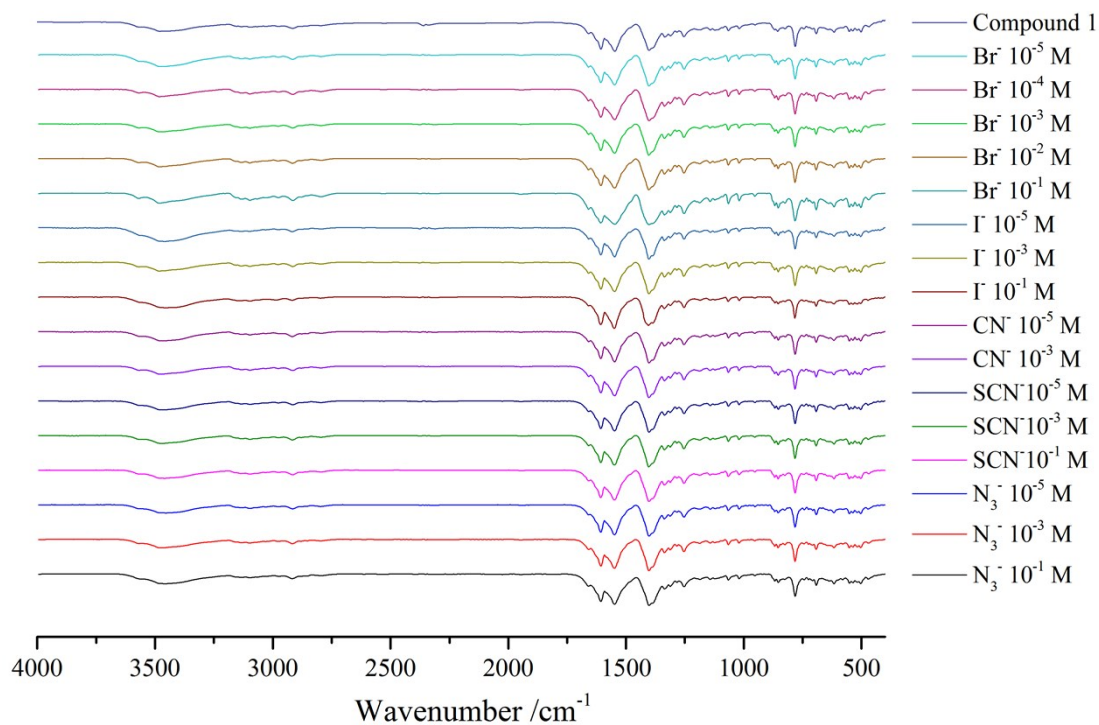

**Figure SI12.** IR spectrum of **1** in anions exchange experiment.

**Table SI5.** The selected bond length (Å) and bond angle (deg) data for compound 1–9.

| <b>Compound 1</b>     |             |                                          |            | <b>Compound 2</b>     |           |                                          |             |
|-----------------------|-------------|------------------------------------------|------------|-----------------------|-----------|------------------------------------------|-------------|
| Eu1—Eu1 <sup>i</sup>  | 4.0431 (13) | O9—Eu1—Eu1 <sup>i</sup>                  | 71.2 (2)   | Eu1—Eu1 <sup>i</sup>  | 4.0539    | O1—Eu1—Eu1 <sup>i</sup>                  | 155.71 (19) |
| Eu1—O9                | 2.500 (8)   | O9—Eu1—O7 <sup>iii</sup>                 | 70.9 (3)   | Eu1—O1                | 2.361 (6) | O1—Eu1—O9                                | 132.6 (2)   |
| Eu1—O5                | 2.262 (9)   | O9—Eu1—C34 <sup>ii</sup>                 | 99.5 (3)   | Eu1—O2 <sup>ii</sup>  | 2.330 (6) | O1—Eu1—O8 <sup>iv</sup>                  | 84.1 (2)    |
| Eu1—O7 <sup>ii</sup>  | 2.483 (8)   | O9—Eu1—O8 <sup>ii</sup>                  | 122.7 (3)  | Eu1—O5                | 2.279 (6) | O1—Eu1—C34 <sup>iv</sup>                 | 109.1 (2)   |
| Eu1—O7 <sup>iii</sup> | 2.516 (8)   | O5—Eu1—Eu1 <sup>i</sup>                  | 82.0 (2)   | Eu1—O9                | 2.504 (6) | O1—Eu1—O7 <sup>v</sup>                   | 139.7 (2)   |
| Eu1—C34 <sup>ii</sup> | 2.859 (14)  | O5—Eu1—O9                                | 140.2 (3)  | Eu1—O3 <sup>iii</sup> | 2.323 (6) | O1—Eu1—O7 <sup>iv</sup>                  | 135.5 (2)   |
| Eu1—O1                | 2.355 (9)   | O5—Eu1—O7 <sup>iii</sup>                 | 70.2 (3)   | Eu1—O8 <sup>iv</sup>  | 2.557 (6) | O2 <sup>ii</sup> —Eu1—Eu1 <sup>i</sup>   | 112.45 (14) |
| Eu1—O2 <sup>iv</sup>  | 2.324 (9)   | O5—Eu1—O7 <sup>ii</sup>                  | 96.7 (3)   | Eu1—C34 <sup>iv</sup> | 2.878 (8) | O2 <sup>ii</sup> —Eu1—O1                 | 80.7 (2)    |
| Eu1—O3 <sup>v</sup>   | 2.328 (9)   | O5—Eu1—C34 <sup>ii</sup>                 | 91.2 (3)   | Eu1—O7 <sup>v</sup>   | 2.517 (6) | O2 <sup>ii</sup> —Eu1—O9                 | 73.2 (2)    |
| Eu1—O8 <sup>ii</sup>  | 2.572 (9)   | O5—Eu1—O1                                | 77.4 (3)   | Eu1—O7 <sup>iv</sup>  | 2.491 (6) | O2 <sup>ii</sup> —Eu1—O8 <sup>iv</sup>   | 73.2 (2)    |
|                       |             | O5—Eu1—O2 <sup>iv</sup>                  | 146.0 (3)  |                       |           | O2 <sup>ii</sup> —Eu1—C34 <sup>iv</sup>  | 72.3 (2)    |
|                       |             | O5—Eu1—O3 <sup>v</sup>                   | 95.8 (3)   |                       |           | O2 <sup>ii</sup> —Eu1—O7 <sup>v</sup>    | 138.9 (2)   |
|                       |             | O5—Eu1—O8 <sup>ii</sup>                  | 79.6 (3)   |                       |           | O2 <sup>ii</sup> —Eu1—O7 <sup>iv</sup>   | 82.0 (2)    |
|                       |             | O7 <sup>ii</sup> —Eu1—Eu1 <sup>i</sup>   | 36.29 (19) |                       |           | O5—Eu1—Eu1 <sup>i</sup>                  | 81.58 (16)  |
|                       |             | O7 <sup>iii</sup> —Eu1—Eu1 <sup>i</sup>  | 35.75 (19) |                       |           | O5—Eu1—O1                                | 77.1 (2)    |
|                       |             | O7 <sup>ii</sup> —Eu1—O9                 | 78.9 (3)   |                       |           | O5—Eu1—O2 <sup>ii</sup>                  | 146.3 (2)   |
|                       |             | O7 <sup>ii</sup> —Eu1—O7 <sup>iii</sup>  | 72.0 (3)   |                       |           | O5—Eu1—O9                                | 139.9 (2)   |
|                       |             | O7 <sup>ii</sup> —Eu1—C34 <sup>ii</sup>  | 26.3 (3)   |                       |           | O5—Eu1—O3 <sup>iii</sup>                 | 95.6 (2)    |
|                       |             | O7 <sup>iii</sup> —Eu1—C34 <sup>ii</sup> | 94.1 (4)   |                       |           | O5—Eu1—O8 <sup>iv</sup>                  | 79.6 (2)    |
|                       |             | O7 <sup>ii</sup> —Eu1—O8 <sup>ii</sup>   | 51.7 (3)   |                       |           | O5—Eu1—C34 <sup>iv</sup>                 | 91.4 (2)    |
|                       |             | O7 <sup>iii</sup> —Eu1—O8 <sup>ii</sup>  | 111.1 (3)  |                       |           | O5—Eu1—O7 <sup>v</sup>                   | 69.7 (2)    |
|                       |             | C34 <sup>ii</sup> —Eu1—Eu1 <sup>i</sup>  | 59.6 (3)   |                       |           | O5—Eu1—O7 <sup>iv</sup>                  | 96.5 (2)    |
|                       |             | O1—Eu1—Eu1 <sup>i</sup>                  | 156.7 (2)  |                       |           | O9—Eu1—Eu1 <sup>i</sup>                  | 71.70 (15)  |
|                       |             | O1—Eu1—O9                                | 132.0 (3)  |                       |           | O9—Eu1—O8 <sup>iv</sup>                  | 123.1 (2)   |
|                       |             | O1—Eu1—O7 <sup>ii</sup>                  | 136.2 (3)  |                       |           | O9—Eu1—C34 <sup>iv</sup>                 | 99.8 (2)    |
|                       |             | O1—Eu1—O7 <sup>iii</sup>                 | 139.9 (3)  |                       |           | O9—Eu1—O7 <sup>v</sup>                   | 71.2 (2)    |
|                       |             | O1—Eu1—C34 <sup>ii</sup>                 | 109.8 (4)  |                       |           | O3 <sup>iii</sup> —Eu1—Eu1 <sup>i</sup>  | 116.57 (15) |
|                       |             | O1—Eu1—O8 <sup>ii</sup>                  | 84.8 (3)   |                       |           | O3 <sup>iii</sup> —Eu1—O1                | 77.3 (2)    |
|                       |             | O2 <sup>iv</sup> —Eu1—Eu1 <sup>i</sup>   | 112.7 (2)  |                       |           | O3 <sup>iii</sup> —Eu1—O2 <sup>ii</sup>  | 104.0 (2)   |
|                       |             | O2 <sup>iv</sup> —Eu1—O9                 | 73.2 (3)   |                       |           | O3 <sup>iii</sup> —Eu1—O9                | 71.7 (2)    |
|                       |             | O2 <sup>iv</sup> —Eu1—O7 <sup>ii</sup>   | 82.2 (3)   |                       |           | O3 <sup>iii</sup> —Eu1—O8 <sup>iv</sup>  | 161.4 (2)   |
|                       |             | O2 <sup>iv</sup> —Eu1—O7 <sup>iii</sup>  | 139.0 (3)  |                       |           | O3 <sup>iii</sup> —Eu1—C34 <sup>iv</sup> | 171.5 (2)   |
|                       |             | O2 <sup>iv</sup> —Eu1—C34 <sup>ii</sup>  | 72.8 (3)   |                       |           | O3 <sup>iii</sup> —Eu1—O7 <sup>v</sup>   | 83.7 (2)    |
|                       |             | O2 <sup>iv</sup> —Eu1—O1                 | 80.2 (3)   |                       |           | O3 <sup>iii</sup> —Eu1—O7 <sup>iv</sup>  | 146.9 (2)   |
|                       |             | O2 <sup>iv</sup> —Eu1—O3 <sup>v</sup>    | 103.2 (3)  |                       |           | O8 <sup>iv</sup> —Eu1—Eu1 <sup>i</sup>   | 80.67 (14)  |
|                       |             | O2 <sup>iv</sup> —Eu1—O8 <sup>ii</sup>   | 73.2 (3)   |                       |           | O8 <sup>iv</sup> —Eu1—C34 <sup>iv</sup>  | 25.7 (2)    |
|                       |             | O3 <sup>v</sup> —Eu1—Eu1 <sup>i</sup>    | 116.9 (2)  |                       |           | C34 <sup>iv</sup> —Eu1—Eu1 <sup>i</sup>  | 59.68 (18)  |
|                       |             | O3 <sup>v</sup> —Eu1—O9                  | 72.1 (3)   |                       |           | O7 <sup>iv</sup> —Eu1—Eu1 <sup>i</sup>   | 36.16 (13)  |
|                       |             | O3 <sup>v</sup> —Eu1—O7 <sup>ii</sup>    | 147.2 (3)  |                       |           | O7 <sup>v</sup> —Eu1—Eu1 <sup>i</sup>    | 35.74 (13)  |
|                       |             | O3 <sup>v</sup> —Eu1—O7 <sup>iii</sup>   | 84.1 (3)   |                       |           | O7 <sup>iv</sup> —Eu1—O9                 | 79.4 (2)    |
|                       |             | O3 <sup>v</sup> —Eu1—C34 <sup>ii</sup>   | 171.6 (3)  |                       |           | O7 <sup>iv</sup> —Eu1—O8 <sup>iv</sup>   | 51.57 (19)  |
|                       |             | O3 <sup>v</sup> —Eu1—O1                  | 76.2 (3)   |                       |           | O7 <sup>v</sup> —Eu1—O8 <sup>iv</sup>    | 110.7 (2)   |
|                       |             | O3 <sup>v</sup> —Eu1—O8 <sup>ii</sup>    | 161.0 (3)  |                       |           | O7 <sup>v</sup> —Eu1—C34 <sup>iv</sup>   | 94.2 (2)    |
|                       |             | O8 <sup>ii</sup> —Eu1—Eu1 <sup>i</sup>   | 81.0 (2)   |                       |           | O7 <sup>iv</sup> —Eu1—C34 <sup>iv</sup>  | 26.4 (2)    |
|                       |             | O8 <sup>ii</sup> —Eu1—C34 <sup>ii</sup>  | 25.8 (3)   |                       |           | O7 <sup>iv</sup> —Eu1—O7 <sup>v</sup>    | 71.9 (2)    |

Symmetry codes: (i)  $-x, -y-1, -z-1$ ; (ii)  $x+1, y, z+1$ ; (iii)  $-x-1, -y-1, -z-2$ ; (iv)  $-x-1, -y-1, -z-1$ ; (v)  $-x-2, -y-1, -z-2$ ; (vi)  $x-1, y, z-1$

Symmetry codes: (i)  $-x, -y-1, -z-1$ ; (ii)  $-x+1, -y-1, -z-1$ ; (iii)  $-x+2, -y-1, -z$ ; (iv)  $x-1, y, z-1$ ; (v)  $-x+1, -y-1, -z$ ; (vi)  $x+1, y, z+1$ .

**Compound 3**

|                       |             |                                         |             |
|-----------------------|-------------|-----------------------------------------|-------------|
| Eu3—Eu3 <sup>i</sup>  | 4.0442 (10) | O1—Eu3—Eu3 <sup>i</sup>                 | 156.13 (15) |
| Eu3—O1                | 2.358 (5)   | O1—Eu3—O9                               | 132.32 (19) |
| Eu3—O9                | 2.495 (5)   | O1—Eu3—O7 <sup>v</sup>                  | 134.80 (19) |
| Eu3—O3 <sup>ii</sup>  | 2.311 (6)   | O1—Eu3—O7 <sup>iv</sup>                 | 140.4 (2)   |
| Eu3—O2 <sup>iii</sup> | 2.327 (6)   | O1—Eu3—O8 <sup>v</sup>                  | 83.4 (2)    |
| Eu3—O5                | 2.260 (6)   | O1—Eu3—C34 <sup>v</sup>                 | 108.3 (2)   |
| Eu3—O7 <sup>iv</sup>  | 2.508 (5)   | O9—Eu3—Eu3 <sup>i</sup>                 | 71.55 (12)  |
| Eu3—O7 <sup>v</sup>   | 2.504 (5)   | O9—Eu3—O7 <sup>v</sup>                  | 79.30 (18)  |
| Eu3—O8 <sup>v</sup>   | 2.557 (6)   | O9—Eu3—O7 <sup>iv</sup>                 | 71.04 (18)  |
| Eu3—C34 <sup>v</sup>  | 2.883 (9)   | O9—Eu3—O8 <sup>v</sup>                  | 123.18 (19) |
|                       |             | O9—Eu3—C34 <sup>v</sup>                 | 99.7 (2)    |
|                       |             | O3 <sup>ii</sup> —Eu3—Eu3 <sup>i</sup>  | 117.09 (14) |
|                       |             | O3 <sup>ii</sup> —Eu3—O1                | 77.4 (2)    |
|                       |             | O3 <sup>ii</sup> —Eu3—O9                | 71.91 (19)  |
|                       |             | O3 <sup>ii</sup> —Eu3—O2 <sup>iii</sup> | 103.0 (2)   |
|                       |             | O3 <sup>ii</sup> —Eu3—O7 <sup>v</sup>   | 147.42 (18) |
|                       |             | O3 <sup>ii</sup> —Eu3—O7 <sup>iv</sup>  | 83.86 (19)  |
|                       |             | O3 <sup>ii</sup> —Eu3—O8 <sup>v</sup>   | 160.81 (19) |
|                       |             | O3 <sup>ii</sup> —Eu3—C34 <sup>v</sup>  | 171.5 (2)   |
|                       |             | O2 <sup>iii</sup> —Eu3—Eu3 <sup>i</sup> | 112.11 (13) |
|                       |             | O2 <sup>iii</sup> —Eu3—O1               | 80.3 (2)    |
|                       |             | O2 <sup>iii</sup> —Eu3—O9               | 72.39 (19)  |
|                       |             | O2 <sup>iii</sup> —Eu3—O7 <sup>v</sup>  | 81.90 (19)  |
|                       |             | O2 <sup>iii</sup> —Eu3—O7 <sup>iv</sup> | 138.37 (18) |
|                       |             | O2 <sup>iii</sup> —Eu3—O8 <sup>v</sup>  | 73.8 (2)    |
|                       |             | O2 <sup>iii</sup> —Eu3—C34 <sup>v</sup> | 72.4 (2)    |
|                       |             | O5—Eu3—Eu3 <sup>i</sup>                 | 82.03 (13)  |
|                       |             | O5—Eu3—O1                               | 77.6 (2)    |
|                       |             | O5—Eu3—O9                               | 139.6 (2)   |
|                       |             | O5—Eu3—O3 <sup>ii</sup>                 | 95.1 (2)    |
|                       |             | O5—Eu3—O2 <sup>iii</sup>                | 147.5 (2)   |
|                       |             | O5—Eu3—O7 <sup>iv</sup>                 | 69.6 (2)    |
|                       |             | O5—Eu3—O7 <sup>v</sup>                  | 97.2 (2)    |
|                       |             | O5—Eu3—O8 <sup>v</sup>                  | 80.2 (2)    |
|                       |             | O5—Eu3—C34 <sup>v</sup>                 | 92.3 (2)    |
|                       |             | O7 <sup>v</sup> —Eu3—Eu3 <sup>i</sup>   | 36.25 (12)  |
|                       |             | O7 <sup>v</sup> —Eu3—Eu3 <sup>i</sup>   | 36.18 (12)  |
|                       |             | O7 <sup>v</sup> —Eu3—O7 <sup>iv</sup>   | 72.4 (2)    |
|                       |             | O7 <sup>v</sup> —Eu3—O8 <sup>v</sup>    | 111.35 (18) |
|                       |             | O7 <sup>v</sup> —Eu3—O8 <sup>v</sup>    | 51.69 (17)  |
|                       |             | O7 <sup>v</sup> —Eu3—C34 <sup>v</sup>   | 26.46 (19)  |
|                       |             | O7 <sup>v</sup> —Eu3—C34 <sup>v</sup>   | 94.9 (2)    |
|                       |             | O8 <sup>v</sup> —Eu3—Eu3 <sup>i</sup>   | 80.91 (13)  |
|                       |             | O8 <sup>v</sup> —Eu3—C34 <sup>v</sup>   | 25.8 (2)    |
|                       |             | C34 <sup>v</sup> —Eu3—Eu3 <sup>i</sup>  | 59.88 (18)  |

Symmetry codes: (i)  $-x+2, -y-1, -z$ ; (ii)  $-x, -y-1, -z-1$ ; (iii)  $-x+1, -y-1, -z$ ; (iv)  $-x+1, -y-1, -z-1$ ; (v)  $x+1, y, z+1$ ; (vi)  $x-1, y, z-1$ .

**Compound 4**

|                        |           |                                           |             |
|------------------------|-----------|-------------------------------------------|-------------|
| Tb1—O9                 | 2.465 (4) | O9—Tb1—O7 <sup>i</sup>                    | 71.30 (13)  |
| Tb1—O7 <sup>i</sup>    | 2.506 (4) | O9—Tb1—O8 <sup>ii</sup>                   | 123.54 (13) |
| Tb1—O7 <sup>ii</sup>   | 2.454 (4) | O9—Tb1—C34 <sup>iii</sup>                 | 99.69 (15)  |
| Tb1—O1                 | 2.331 (4) | O7 <sup>ii</sup> —Tb1—O9                  | 79.12 (13)  |
| Tb1—O8 <sup>ii</sup>   | 2.540 (4) | O7 <sup>ii</sup> —Tb1—O7 <sup>i</sup>     | 71.42 (14)  |
| Tb1—O5                 | 2.239 (4) | O7 <sup>i</sup> —Tb1—O8 <sup>ii</sup>     | 110.89 (13) |
| Tb1—C34 <sup>iii</sup> | 2.852 (6) | O7 <sup>ii</sup> —Tb1—O8 <sup>ii</sup>    | 52.41 (12)  |
| Tb1—O3 <sup>iii</sup>  | 2.287 (4) | O7 <sup>ii</sup> —Tb1—C34 <sup>iii</sup>  | 26.65 (13)  |
| Tb1—O2 <sup>iv</sup>   | 2.305 (4) | O7 <sup>i</sup> —Tb1—C34 <sup>iii</sup>   | 93.96 (15)  |
|                        |           | O1—Tb1—O9                                 | 132.63 (14) |
|                        |           | O1—Tb1—O7 <sup>i</sup>                    | 139.94 (13) |
|                        |           | O1—Tb1—O7 <sup>ii</sup>                   | 135.56 (14) |
|                        |           | O1—Tb1—O8 <sup>ii</sup>                   | 83.38 (14)  |
|                        |           | O1—Tb1—C34 <sup>iii</sup>                 | 108.93 (16) |
|                        |           | O8 <sup>ii</sup> —Tb1—C34 <sup>iii</sup>  | 26.36 (14)  |
|                        |           | O5—Tb1—O9                                 | 139.96 (15) |
|                        |           | O5—Tb1—O7 <sup>ii</sup>                   | 96.85 (14)  |
|                        |           | O5—Tb1—O7 <sup>i</sup>                    | 69.74 (14)  |
|                        |           | O5—Tb1—O1                                 | 76.89 (15)  |
|                        |           | O5—Tb1—O8 <sup>ii</sup>                   | 79.63 (15)  |
|                        |           | O5—Tb1—C34 <sup>iii</sup>                 | 91.86 (16)  |
|                        |           | O5—Tb1—O3 <sup>iii</sup>                  | 94.77 (15)  |
|                        |           | O5—Tb1—O2 <sup>iv</sup>                   | 146.37 (15) |
|                        |           | O3 <sup>iii</sup> —Tb1—O9                 | 72.58 (14)  |
|                        |           | O3 <sup>iii</sup> —Tb1—O7 <sup>i</sup>    | 84.54 (13)  |
|                        |           | O3 <sup>iii</sup> —Tb1—O7 <sup>ii</sup>   | 147.56 (13) |
|                        |           | O3 <sup>iii</sup> —Tb1—O1                 | 76.64 (15)  |
|                        |           | O3 <sup>iii</sup> —Tb1—O8 <sup>ii</sup>   | 160.00 (13) |
|                        |           | O3 <sup>iii</sup> —Tb1—C34 <sup>iii</sup> | 172.21 (15) |
|                        |           | O3 <sup>iii</sup> —Tb1—O2 <sup>iv</sup>   | 103.48 (15) |
|                        |           | O2 <sup>iv</sup> —Tb1—O9                  | 73.23 (14)  |
|                        |           | O2 <sup>iv</sup> —Tb1—O7 <sup>i</sup>     | 139.19 (13) |
|                        |           | O2 <sup>iv</sup> —Tb1—O7 <sup>ii</sup>    | 82.71 (14)  |
|                        |           | O2 <sup>iv</sup> —Tb1—O1                  | 80.15 (14)  |
|                        |           | O2 <sup>iv</sup> —Tb1—O8 <sup>ii</sup>    | 73.57 (15)  |
|                        |           | O2 <sup>iv</sup> —Tb1—C34 <sup>iii</sup>  | 72.75 (15)  |

Symmetry codes: (i)  $-x, -y-1, -z-1$ ; (ii)  $x+1, y, z+1$ ; (iii)  $-x-1, -y-1, -z-1$ ; (iv)  $-x, -y-1, -z$ ; (v)  $x-1, y, z-1$ .

**Compound 5**

|                        |           |                                           |             |
|------------------------|-----------|-------------------------------------------|-------------|
| Tb1—O7 <sup>i</sup>    | 2.502 (5) | O7 <sup>iii</sup> —Tb1—O7 <sup>i</sup>    | 71.63 (16)  |
| Tb1—O7 <sup>iii</sup>  | 2.462 (4) | O7 <sup>i</sup> —Tb1—C34 <sup>iii</sup>   | 94.38 (16)  |
| Tb1—C34 <sup>iii</sup> | 2.857 (6) | O7 <sup>iii</sup> —Tb1—C34 <sup>iii</sup> | 26.88 (16)  |
| Tb1—O8 <sup>iii</sup>  | 2.548 (5) | O7 <sup>i</sup> —Tb1—O8 <sup>iii</sup>    | 111.00 (15) |
| Tb1—O2 <sup>iv</sup>   | 2.307 (4) | O7 <sup>iii</sup> —Tb1—O8 <sup>iii</sup>  | 52.28 (14)  |
| Tb1—O3 <sup>v</sup>    | 2.293 (4) | O7 <sup>iii</sup> —Tb1—O9                 | 79.42 (14)  |
| Tb1—O9                 | 2.466 (4) | O5—Tb1—O7 <sup>iii</sup>                  | 96.90 (15)  |
|                        |           | O5—Tb1—O7 <sup>i</sup>                    | 69.58 (16)  |
|                        |           | O5—Tb1—C34 <sup>iii</sup>                 | 91.95 (18)  |
|                        |           | O5—Tb1—O8 <sup>iii</sup>                  | 79.86 (18)  |
|                        |           | O5—Tb1—O1                                 | 77.08 (18)  |
|                        |           | O5—Tb1—O2 <sup>iv</sup>                   | 146.83 (18) |
|                        |           | O5—Tb1—O3 <sup>v</sup>                    | 94.38 (17)  |
|                        |           | O5—Tb1—O9                                 | 139.70 (17) |
|                        |           | O8 <sup>iii</sup> —Tb1—C34 <sup>iii</sup> | 26.00 (16)  |
|                        |           | O1—Tb1—O7 <sup>iii</sup>                  | 134.99 (16) |
|                        |           | O1—Tb1—O7 <sup>i</sup>                    | 140.20 (16) |
|                        |           | O1—Tb1—C34 <sup>iii</sup>                 | 108.12 (18) |
|                        |           | O1—Tb1—O8 <sup>iii</sup>                  | 82.96 (16)  |
|                        |           | O1—Tb1—O9                                 | 132.68 (17) |
|                        |           | O2 <sup>iv</sup> —Tb1—O7 <sup>iii</sup>   | 82.63 (15)  |
|                        |           | O2 <sup>iv</sup> —Tb1—O7 <sup>i</sup>     | 139.01 (15) |
|                        |           | O2 <sup>iv</sup> —Tb1—C34 <sup>iii</sup>  | 72.70 (18)  |
|                        |           | O2 <sup>iv</sup> —Tb1—O8 <sup>iii</sup>   | 73.72 (17)  |
|                        |           | O2 <sup>iv</sup> —Tb1—O1                  | 80.07 (17)  |
|                        |           | O2 <sup>iv</sup> —Tb1—O9                  | 73.07 (16)  |
|                        |           | O3 <sup>v</sup> —Tb1—O7 <sup>iii</sup>    | 147.66 (15) |
|                        |           | O3 <sup>v</sup> —Tb1—O7 <sup>i</sup>      | 84.25 (15)  |
|                        |           | O3 <sup>v</sup> —Tb1—C34 <sup>iii</sup>   | 172.59 (17) |
|                        |           | O3 <sup>v</sup> —Tb1—O8 <sup>iii</sup>    | 160.05 (15) |
|                        |           | O3 <sup>v</sup> —Tb1—O1                   | 77.12 (17)  |
|                        |           | O3 <sup>v</sup> —Tb1—O2 <sup>iv</sup>     | 103.63 (17) |
|                        |           | O3 <sup>v</sup> —Tb1—O9                   | 72.48 (15)  |
|                        |           | O9—Tb1—O7 <sup>i</sup>                    | 71.26 (15)  |
|                        |           | O9—Tb1—C34 <sup>iii</sup>                 | 100.18 (16) |
|                        |           | O9—Tb1—O8 <sup>iii</sup>                  | 123.73 (15) |

Symmetry codes: (i)  $-x, -y, -z$ ; (ii)  $x-1, y, z-1$ ; (iii)  $x+1, y, z+1$ ; (iv)  $-x, -y,$  $-z+1$ ; (v)  $-x-1, -y, -z.$ **Compound 6**

|                       |           |                                         |             |
|-----------------------|-----------|-----------------------------------------|-------------|
| Tb2—O3 <sup>i</sup>   | 2.360 (3) | O3—Tb2—O3 <sup>i</sup>                  | 110.81 (17) |
| Tb2—O3                | 2.360 (3) | O3—Tb2—O7                               | 71.83 (12)  |
| Tb2—O6 <sup>ii</sup>  | 2.281 (3) | O3—Tb2—O7                               | 140.34 (11) |
| Tb2—O6 <sup>iii</sup> | 2.281 (3) | O3—Tb2—O7 <sup>i</sup>                  | 140.34 (11) |
| Tb2—O7 <sup>i</sup>   | 2.467 (3) | O3—Tb2—O7 <sup>i</sup>                  | 71.82 (12)  |
| Tb2—O7                | 2.467 (3) | O3—Tb2—O10 <sup>i</sup>                 | 69.78 (15)  |
| Tb2—O10               | 2.429 (4) | O3—Tb2—O10                              | 78.55 (14)  |
| Tb2—O10 <sup>i</sup>  | 2.429 (4) | O3—Tb2—O10 <sup>i</sup>                 | 78.55 (13)  |
| Tb1—O1                | 2.449 (3) | O3—Tb2—O10                              | 69.78 (15)  |
| Tb1—O1 <sup>iv</sup>  | 2.449 (3) | O6 <sup>ii</sup> —Tb2—O3 <sup>i</sup>   | 89.67 (12)  |
| Tb1—O4 <sup>v</sup>   | 2.296 (4) | O6 <sup>iii</sup> —Tb2—O3               | 89.67 (12)  |
| Tb1—O4 <sup>vi</sup>  | 2.296 (3) | O6 <sup>ii</sup> —Tb2—O3                | 141.81 (13) |
| Tb1—O5                | 2.377 (3) | O6 <sup>iii</sup> —Tb2—O3 <sup>i</sup>  | 141.81 (13) |
| Tb1—O5 <sup>iv</sup>  | 2.377 (3) | O6 <sup>iii</sup> —Tb2—O6 <sup>ii</sup> | 93.21 (17)  |
| Tb1—O9 <sup>iv</sup>  | 2.450 (4) | O6 <sup>iii</sup> —Tb2—O7 <sup>i</sup>  | 72.06 (12)  |
| Tb1—O9                | 2.450 (4) | O6 <sup>ii</sup> —Tb2—O7                | 72.06 (12)  |
|                       |           | O6 <sup>iii</sup> —Tb2—O7               | 75.75 (12)  |
|                       |           | O6 <sup>ii</sup> —Tb2—O7 <sup>i</sup>   | 75.75 (12)  |
|                       |           | O6 <sup>ii</sup> —Tb2—O10 <sup>i</sup>  | 79.08 (14)  |
|                       |           | O6 <sup>iii</sup> —Tb2—O10 <sup>i</sup> | 147.97 (16) |
|                       |           | O6 <sup>ii</sup> —Tb2—O10               | 147.97 (16) |
|                       |           | O6 <sup>iii</sup> —Tb2—O10              | 79.08 (14)  |
|                       |           | O7—Tb2—O7 <sup>i</sup>                  | 132.43 (17) |
|                       |           | O10—Tb2—O7                              | 133.68 (14) |
|                       |           | O10 <sup>i</sup> —Tb2—O7                | 72.29 (15)  |
|                       |           | O10 <sup>i</sup> —Tb2—O7 <sup>i</sup>   | 133.68 (14) |
|                       |           | O10 <sup>i</sup> —Tb2—O7 <sup>i</sup>   | 72.29 (15)  |
|                       |           | O10 <sup>i</sup> —Tb2—O10               | 122.7 (2)   |
|                       |           | O1—Tb1—O1 <sup>iv</sup>                 | 131.58 (15) |
|                       |           | O1 <sup>iv</sup> —Tb1—O9                | 132.05 (12) |
|                       |           | O1—Tb1—O9                               | 73.68 (13)  |
|                       |           | O1—Tb1—O9 <sup>iv</sup>                 | 132.05 (12) |
|                       |           | O1 <sup>iv</sup> —Tb1—O9 <sup>iv</sup>  | 73.68 (13)  |
|                       |           | O4 <sup>v</sup> —Tb1—O1 <sup>iv</sup>   | 74.39 (11)  |
|                       |           | O4 <sup>vi</sup> —Tb1—O1                | 74.39 (11)  |
|                       |           | O4 <sup>vi</sup> —Tb1—O1 <sup>iv</sup>  | 73.75 (12)  |
|                       |           | O4 <sup>v</sup> —Tb1—O1                 | 73.75 (12)  |
|                       |           | O4 <sup>v</sup> —Tb1—O4 <sup>vi</sup>   | 95.98 (18)  |
|                       |           | O4 <sup>vi</sup> —Tb1—O5 <sup>iv</sup>  | 89.99 (12)  |
|                       |           | O4 <sup>vi</sup> —Tb1—O5                | 142.43 (12) |
|                       |           | O4 <sup>v</sup> —Tb1—O5                 | 89.99 (12)  |
|                       |           | O4 <sup>v</sup> —Tb1—O5 <sup>iv</sup>   | 142.44 (12) |
|                       |           | O4 <sup>vi</sup> —Tb1—O9                | 78.06 (13)  |
|                       |           | O4 <sup>v</sup> —Tb1—O9                 | 147.30 (13) |
|                       |           | O4 <sup>v</sup> —Tb1—O9 <sup>iv</sup>   | 78.06 (13)  |
|                       |           | O4 <sup>vi</sup> —Tb1—O9 <sup>iv</sup>  | 147.30 (13) |
|                       |           | O5—Tb1—O1                               | 71.83 (11)  |
|                       |           | O5 <sup>iv</sup> —Tb1—O1                | 142.89 (12) |
|                       |           | O5—Tb1—O1 <sup>iv</sup>                 | 142.89 (12) |
|                       |           | O5 <sup>iv</sup> —Tb1—O1 <sup>iv</sup>  | 71.83 (11)  |
|                       |           | O5—Tb1—O5 <sup>iv</sup>                 | 107.39 (16) |
|                       |           | O5 <sup>iv</sup> —Tb1—O9                | 70.19 (13)  |
|                       |           | O5 <sup>iv</sup> —Tb1—O9 <sup>iv</sup>  | 77.14 (13)  |
|                       |           | O5—Tb1—O9 <sup>iv</sup>                 | 70.19 (13)  |
|                       |           | O5—Tb1—O9                               | 77.14 (13)  |
|                       |           | O9 <sup>iv</sup> —Tb1—O9                | 123.40 (19) |

Symmetry codes: (i)  $-x+1, y, -z+3/2$ ; (ii)  $x+1/2, -y+1/2, z+1/2$ ; (iii)  $-x+1/2,$  $-y+1/2, -z+1$ ; (iv)  $-x, y, -z+1/2$ ; (v)  $-x+1/2, -y+3/2, -z+1$ ; (vi)  $x-1/2,$  $-y+3/2, z-1/2.$

### Compound 7

|                        |            |                                          |             |
|------------------------|------------|------------------------------------------|-------------|
| Gd1—O3 <sup>i</sup>    | 2.290 (6)  | O1—Gd1—Gd1 <sup>iii</sup>                | 155.80 (18) |
| Gd1—O2 <sup>ii</sup>   | 2.322 (6)  | O1—Gd1—O9                                | 132.1 (2)   |
| Gd1—Gd1 <sup>iii</sup> | 4.0062 (8) | O1—Gd1—O7 <sup>iv</sup>                  | 139.5 (2)   |
| Gd1—O9                 | 2.483 (6)  | O1—Gd1—O7 <sup>v</sup>                   | 135.6 (2)   |
| Gd1—O7 <sup>iv</sup>   | 2.490 (6)  | O1—Gd1—O8 <sup>v</sup>                   | 83.5 (2)    |
| Gd1—O7 <sup>v</sup>    | 2.464 (6)  | O1—Gd1—C34 <sup>v</sup>                  | 109.1 (2)   |
| Gd1—O8 <sup>v</sup>    | 2.553 (7)  | O3 <sup>i</sup> —Gd1—O1                  | 76.2 (2)    |
| Gd1—O5                 | 2.248 (6)  | O3 <sup>i</sup> —Gd1—O2 <sup>ii</sup>    | 103.8 (2)   |
| Gd1—C34 <sup>v</sup>   | 2.863 (9)  | O3 <sup>i</sup> —Gd1—Gd1 <sup>iii</sup>  | 117.03 (15) |
|                        |            | O3 <sup>i</sup> —Gd1—O9                  | 72.3 (2)    |
|                        |            | O3 <sup>i</sup> —Gd1—O7 <sup>iv</sup>    | 83.8 (2)    |
|                        |            | O3 <sup>i</sup> —Gd1—O7 <sup>v</sup>     | 148.0 (2)   |
|                        |            | O3 <sup>i</sup> —Gd1—O8 <sup>v</sup>     | 159.7 (2)   |
|                        |            | O3 <sup>i</sup> —Gd1—C34 <sup>v</sup>    | 172.7 (2)   |
|                        |            | O2 <sup>ii</sup> —Gd1—O1                 | 80.8 (2)    |
|                        |            | O2 <sup>ii</sup> —Gd1—Gd1 <sup>iii</sup> | 112.77 (15) |
|                        |            | O2 <sup>ii</sup> —Gd1—O9                 | 72.9 (2)    |
|                        |            | O2 <sup>ii</sup> —Gd1—O7 <sup>v</sup>    | 82.5 (2)    |
|                        |            | O2 <sup>ii</sup> —Gd1—O7 <sup>iv</sup>   | 138.8 (2)   |
|                        |            | O2 <sup>ii</sup> —Gd1—O8 <sup>v</sup>    | 73.5 (2)    |
|                        |            | O2 <sup>ii</sup> —Gd1—C34 <sup>v</sup>   | 72.7 (2)    |
|                        |            | O9—Gd1—Gd1 <sup>iii</sup>                | 72.04 (15)  |
|                        |            | O9—Gd1—O7 <sup>iv</sup>                  | 71.1 (2)    |
|                        |            | O9—Gd1—O8 <sup>v</sup>                   | 124.0 (2)   |
|                        |            | O9—Gd1—C34 <sup>v</sup>                  | 100.4 (2)   |
|                        |            | O7 <sup>iv</sup> —Gd1—Gd1 <sup>iii</sup> | 35.81 (13)  |
|                        |            | O7 <sup>v</sup> —Gd1—Gd1 <sup>iii</sup>  | 36.26 (13)  |
|                        |            | O7 <sup>v</sup> —Gd1—O9                  | 80.0 (2)    |
|                        |            | O7 <sup>v</sup> —Gd1—O7 <sup>iv</sup>    | 72.1 (2)    |
|                        |            | O7 <sup>iv</sup> —Gd1—O8 <sup>v</sup>    | 111.8 (2)   |
|                        |            | O7 <sup>v</sup> —Gd1—O8 <sup>v</sup>     | 52.3 (2)    |
|                        |            | O7 <sup>v</sup> —Gd1—C34 <sup>v</sup>    | 26.6 (2)    |
|                        |            | O7 <sup>iv</sup> —Gd1—C34 <sup>v</sup>   | 94.7 (2)    |
|                        |            | O8 <sup>v</sup> —Gd1—Gd1 <sup>iii</sup>  | 81.64 (14)  |
|                        |            | O8 <sup>v</sup> —Gd1—C34 <sup>v</sup>    | 26.3 (2)    |
|                        |            | O5—Gd1—O1                                | 77.0 (2)    |
|                        |            | O5—Gd1—O3 <sup>i</sup>                   | 94.8 (2)    |
|                        |            | O5—Gd1—O2 <sup>ii</sup>                  | 146.6 (2)   |
|                        |            | O5—Gd1—Gd1 <sup>iii</sup>                | 81.58 (16)  |
|                        |            | O5—Gd1—O9                                | 140.0 (2)   |
|                        |            | O5—Gd1—O7 <sup>v</sup>                   | 96.3 (2)    |
|                        |            | O5—Gd1—O7 <sup>iv</sup>                  | 69.9 (2)    |
|                        |            | O5—Gd1—O8 <sup>v</sup>                   | 79.5 (2)    |
|                        |            | O5—Gd1—C34 <sup>v</sup>                  | 91.4 (2)    |
|                        |            | C34 <sup>v</sup> —Gd1—Gd1 <sup>iii</sup> | 60.05 (17)  |

Symmetry codes: (i)  $-x+2, -y+1, -z+1$ ; (ii)  $-x+3, -y+1, -z+2$ ; (iii)  $-x+4, -y+1, -z+2$ ; (iv)  $-x+3, -y+1, -z+1$ ; (v)  $x+1, y, z+1$ ; (vi)  $x-1, y, z-1$ .

### Compound 8

|                       |            |                                          |             |
|-----------------------|------------|------------------------------------------|-------------|
| Gd1—Gd1 <sup>i</sup>  | 4.0059 (7) | O5—Gd1—Gd1 <sup>i</sup>                  | 81.24 (14)  |
| Gd1—O5                | 2.258 (5)  | O5—Gd1—O9                                | 139.6 (2)   |
| Gd1—O9                | 2.488 (5)  | O5—Gd1—O7 <sup>ii</sup>                  | 96.10 (18)  |
| Gd1—O7 <sup>ii</sup>  | 2.464 (5)  | O5—Gd1—O7 <sup>iii</sup>                 | 69.47 (19)  |
| Gd1—O7 <sup>iii</sup> | 2.487 (5)  | O5—Gd1—O8 <sup>ii</sup>                  | 79.5 (2)    |
| Gd1—O8 <sup>ii</sup>  | 2.575 (5)  | O5—Gd1—O1                                | 76.9 (2)    |
| Gd1—O1                | 2.339 (5)  | O5—Gd1—O3 <sup>iv</sup>                  | 94.80 (19)  |
| Gd1—O3 <sup>iv</sup>  | 2.304 (5)  | O5—Gd1—O2 <sup>v</sup>                   | 147.0 (2)   |
| Gd1—O2 <sup>v</sup>   | 2.323 (5)  | O5—Gd1—C34 <sup>ii</sup>                 | 91.8 (2)    |
| Gd1—C34 <sup>ii</sup> | 2.874 (8)  | O9—Gd1—Gd1 <sup>i</sup>                  | 72.15 (12)  |
|                       |            | O9—Gd1—O8 <sup>ii</sup>                  | 123.97 (17) |
|                       |            | O9—Gd1—C34 <sup>ii</sup>                 | 100.14 (19) |
|                       |            | O7 <sup>ii</sup> —Gd1—Gd1 <sup>i</sup>   | 36.19 (12)  |
|                       |            | O7 <sup>iii</sup> —Gd1—Gd1 <sup>i</sup>  | 35.81 (11)  |
|                       |            | O7 <sup>ii</sup> —Gd1—O9                 | 80.07 (17)  |
|                       |            | O7 <sup>iii</sup> —Gd1—O9                | 71.17 (17)  |
|                       |            | O7 <sup>ii</sup> —Gd1—O7 <sup>iii</sup>  | 72.01 (19)  |
|                       |            | O7 <sup>iii</sup> —Gd1—O8 <sup>ii</sup>  | 111.23 (17) |
|                       |            | O7 <sup>ii</sup> —Gd1—O8 <sup>ii</sup>   | 51.90 (16)  |
|                       |            | O7 <sup>iii</sup> —Gd1—C34 <sup>ii</sup> | 94.6 (2)    |
|                       |            | O7 <sup>ii</sup> —Gd1—C34 <sup>ii</sup>  | 26.38 (19)  |
|                       |            | O8 <sup>ii</sup> —Gd1—Gd1 <sup>i</sup>   | 81.10 (12)  |
|                       |            | O8 <sup>ii</sup> —Gd1—C34 <sup>ii</sup>  | 26.23 (18)  |
|                       |            | O1—Gd1—Gd1 <sup>i</sup>                  | 155.15 (14) |
|                       |            | O1—Gd1—O9                                | 132.68 (18) |
|                       |            | O1—Gd1—O7 <sup>ii</sup>                  | 135.12 (18) |
|                       |            | O1—Gd1—O7 <sup>iii</sup>                 | 139.41 (18) |
|                       |            | O1—Gd1—O8 <sup>ii</sup>                  | 83.39 (18)  |
|                       |            | O1—Gd1—C34 <sup>ii</sup>                 | 108.8 (2)   |
|                       |            | O3 <sup>iv</sup> —Gd1—Gd1 <sup>i</sup>   | 117.44 (13) |
|                       |            | O3 <sup>iv</sup> —Gd1—O9                 | 72.41 (17)  |
|                       |            | O3 <sup>iv</sup> —Gd1—O7 <sup>iii</sup>  | 84.22 (18)  |
|                       |            | O3 <sup>iv</sup> —Gd1—O7 <sup>ii</sup>   | 148.28 (17) |
|                       |            | O3 <sup>iv</sup> —Gd1—O8 <sup>ii</sup>   | 159.81 (18) |
|                       |            | O3 <sup>iv</sup> —Gd1—O1                 | 76.44 (19)  |
|                       |            | O3 <sup>iv</sup> —Gd1—O2 <sup>v</sup>    | 103.97 (19) |
|                       |            | O3 <sup>iv</sup> —Gd1—C34 <sup>ii</sup>  | 172.4 (2)   |
|                       |            | O2 <sup>v</sup> —Gd1—Gd1 <sup>i</sup>    | 112.34 (13) |
|                       |            | O2 <sup>v</sup> —Gd1—O9                  | 72.86 (18)  |
|                       |            | O2 <sup>v</sup> —Gd1—O7 <sup>iii</sup>   | 138.49 (17) |
|                       |            | O2 <sup>v</sup> —Gd1—O7 <sup>ii</sup>    | 82.07 (18)  |
|                       |            | O2 <sup>v</sup> —Gd1—O8 <sup>ii</sup>    | 73.52 (18)  |
|                       |            | O2 <sup>v</sup> —Gd1—O1                  | 81.34 (19)  |
|                       |            | O2 <sup>v</sup> —Gd1—C34 <sup>ii</sup>   | 72.0 (2)    |
|                       |            | C34 <sup>ii</sup> —Gd1—Gd1 <sup>i</sup>  | 59.92 (16)  |

Symmetry codes: (i)  $-x-2, -y, -z-2$ ; (ii)  $x-1, y, z-1$ ; (iii)  $-x-1, -y, -z-1$ ; (iv)  $-x, -y, -z-1$ ; (v)  $-x-1, -y, -z-2$ ; (vi)  $x+1, y, z+1$ .

## Compound 9

|                        |           |                                           |             |
|------------------------|-----------|-------------------------------------------|-------------|
| Gd1—O8 <sup>iii</sup>  | 2.559 (6) | O8 <sup>iii</sup> —Gd1—C34 <sup>iii</sup> | 25.9 (2)    |
| Gd1—O7 <sup>ii</sup>   | 2.514 (6) | O8 <sup>iii</sup> —Gd1—Gd1 <sup>iv</sup>  | 80.77 (14)  |
| Gd1—O7 <sup>iii</sup>  | 2.484 (6) | O7 <sup>iii</sup> —Gd1—O8 <sup>iii</sup>  | 51.82 (19)  |
| Gd1—C34 <sup>iii</sup> | 2.876 (9) | O7 <sup>ii</sup> —Gd1—O8 <sup>iii</sup>   | 110.63 (19) |
| Gd1—Gd2 <sup>iv</sup>  | 4.050 (6) | O7 <sup>iii</sup> —Gd1—O7 <sup>ii</sup>   | 71.7 (2)    |
| Gd1—O1                 | 2.344 (7) | O7 <sup>iii</sup> —Gd1—C34 <sup>iii</sup> | 26.6 (2)    |
| Gd1—O9                 | 2.502 (6) | O7 <sup>ii</sup> —Gd1—C34 <sup>iii</sup>  | 94.3 (2)    |
| Gd1—O2 <sup>v</sup>    | 2.327 (6) | O7 <sup>ii</sup> —Gd1—Gd1 <sup>iv</sup>   | 35.63 (13)  |
| Gd1—O3 <sup>vi</sup>   | 2.316 (6) | O7 <sup>iii</sup> —Gd1—Gd1 <sup>iv</sup>  | 36.12 (13)  |
|                        |           | O7 <sup>iii</sup> —Gd1—O9                 | 79.1 (2)    |
|                        |           | O5—Gd1—O8 <sup>iii</sup>                  | 80.0 (2)    |
|                        |           | O5—Gd1—O7 <sup>iii</sup>                  | 97.4 (2)    |
|                        |           | O5—Gd1—O7 <sup>ii</sup>                   | 69.9 (2)    |
|                        |           | O5—Gd1—C34 <sup>iii</sup>                 | 92.5 (3)    |
|                        |           | O5—Gd1—Gd1 <sup>iv</sup>                  | 82.25 (15)  |
|                        |           | O5—Gd1—O1                                 | 76.9 (2)    |
|                        |           | O5—Gd1—O9                                 | 139.8 (2)   |
|                        |           | O5—Gd1—O2 <sup>v</sup>                    | 147.1 (2)   |
|                        |           | O5—Gd1—O3 <sup>vi</sup>                   | 94.7 (2)    |
|                        |           | C34 <sup>iii</sup> —Gd1—Gd1 <sup>iv</sup> | 59.84 (19)  |
|                        |           | O1—Gd1—O8 <sup>iii</sup>                  | 83.4 (2)    |
|                        |           | O1—Gd1—O7 <sup>ii</sup>                   | 140.37 (19) |
|                        |           | O1—Gd1—O7 <sup>iii</sup>                  | 134.9 (2)   |
|                        |           | O1—Gd1—C34 <sup>iii</sup>                 | 108.3 (3)   |
|                        |           | O1—Gd1—Gd1 <sup>iv</sup>                  | 155.64 (17) |
|                        |           | O1—Gd1—O9                                 | 132.9 (2)   |
|                        |           | O9—Gd1—O8 <sup>iii</sup>                  | 123.3 (2)   |
|                        |           | O9—Gd1—O7 <sup>ii</sup>                   | 71.05 (19)  |
|                        |           | O9—Gd1—C34 <sup>iii</sup>                 | 99.6 (2)    |
|                        |           | O9—Gd1—Gd1 <sup>iv</sup>                  | 71.48 (15)  |
|                        |           | O2 <sup>v</sup> —Gd1—O8 <sup>iii</sup>    | 73.9 (2)    |
|                        |           | O2 <sup>v</sup> —Gd1—O7 <sup>ii</sup>     | 138.44 (19) |
|                        |           | O2 <sup>v</sup> —Gd1—O7 <sup>iii</sup>    | 82.1 (2)    |
|                        |           | O2 <sup>v</sup> —Gd1—C34 <sup>iii</sup>   | 72.4 (2)    |
|                        |           | O2 <sup>v</sup> —Gd1—Gd1 <sup>iv</sup>    | 112.34 (17) |
|                        |           | O2 <sup>v</sup> —Gd1—O1                   | 80.5 (2)    |
|                        |           | O2 <sup>v</sup> —Gd1—O9                   | 72.7 (2)    |
|                        |           | O3 <sup>vi</sup> —Gd1—O8 <sup>iii</sup>   | 160.5 (2)   |
|                        |           | O3 <sup>vi</sup> —Gd1—O7 <sup>iii</sup>   | 147.7 (2)   |
|                        |           | O3 <sup>vi</sup> —Gd1—O7 <sup>ii</sup>    | 84.6 (2)    |
|                        |           | O3 <sup>vi</sup> —Gd1—C34 <sup>iii</sup>  | 171.9 (2)   |
|                        |           | O3 <sup>vi</sup> —Gd1—Gd1 <sup>iv</sup>   | 117.36 (15) |
|                        |           | O3 <sup>vi</sup> —Gd1—O1                  | 77.1 (2)    |
|                        |           | O3 <sup>vi</sup> —Gd1—O9                  | 72.4 (2)    |
|                        |           | O3 <sup>vi</sup> —Gd1—O2 <sup>v</sup>     | 103.2 (2)   |

Symmetry codes: (i)  $x-1, y, z-1$ ; (ii)  $-x+1, -y+1, -z+1$ ; (iii)  $x+1, y, z+1$ ; (iv)

$-x+2, -y+1, -z+2$ ; (v)  $-x+1, -y+1, -z+2$ ; (vi)  $-x, -y+1, -z+1$ .

**Table SI6.** The hydrogen bond data for compound 1–9.**Compound 1:**

| Donor --- H...Acceptor | D – H (Å) | H...A (Å) | D...A (Å) | D - H...A (degree) | Equivalent Position Code |
|------------------------|-----------|-----------|-----------|--------------------|--------------------------|
| O(9) --H(9A) ..O(5)    | 0.88      | 2.30      | 3.157(13) | 163                | -x,-1-y,-1-z             |
| O(9) --H(9A) ..O(6)    | 0.88      | 2.22      | 2.906(14) | 134                | -x,-1-y,-1-z             |
| O(9) --H(9B) ..O(4)    | 0.88      | 1.91      | 2.722(12) | 153                | -2-x,-1-y,-2-z           |
| O(10) --H(10B) ..O(2)  | 0.85      | 2.02      | 2.826(16) | 159                | x,-1/2-y,-1/2+z          |
| C(6) --H(6) ..Cl(1)    | 0.93      | 2.61      | 3.533(14) | 174                |                          |
| C(9) --H(9) ..O(4)     | 0.93      | 2.47      | 3.141(18) | 129                | 1+x,-1/2-y,1/2+z         |
| C(21) --H(21) ..O(10)  | 0.93      | 2.46      | 3.317(19) | 154                |                          |
| C(25) --H(25) ..Cl(2)  | 0.93      | 2.32      | 3.204(13) | 159                |                          |
| C(26) --H(26) ..O(4)   | 0.93      | 2.34      | 3.259(17) | 169                | 1+x,-1/2-y,1/2+z         |
| C(27) --H(27) ..O(6)   | 0.93      | 2.26      | 3.136(19) | 157                | -1+x,-1/2-y,-1/2+z       |

**Compound 2:**

| Donor --- H...Acceptor | D – H (Å) | H...A (Å) | D...A (Å) | D - H...A (degree) | Equivalent Position Code |
|------------------------|-----------|-----------|-----------|--------------------|--------------------------|
| O(9) --H(9A) ..O(5)    | 0.87      | 2.33      | 3.177(10) | 165                | -x,-1-y,-1-z             |
| O(9) --H(9A) ..O(6)    | 0.87      | 2.21      | 2.900(10) | 136                | -x,-1-y,-1-z             |
| O(9) --H(9B) ..O(4)    | 0.87      | 1.91      | 2.689(9)  | 148                | 2-x,-1-y,-z              |
| O(10) --H(10A) ..O(2)  | 0.85      | 2.40      | 2.838(12) | 113                |                          |
| O(10) --H(10B) ..O(2)  | 0.85      | 2.02      | 2.826(16) | 105                |                          |
| O(10) --H(10B) ..O(8)  | 0.85      | 2.16      | 2.955(13) | 156                | -1+x,y,-1+z              |
| C(6) --H(6) ..Br(1)    | 0.93      | 2.61      | 3.539(9)  | 175                |                          |
| C(9) --H(9) ..O(4)     | 0.93      | 2.44      | 3.132(12) | 131                | -1+x,-1/2-y,-1/2+z       |
| C(16) --H(16) ..Br(1)  | 0.93      | 2.92      | 3.845(10) | 176                |                          |
| C(21) --H(21) ..O(10)  | 0.93      | 2.45      | 3.314(15) | 154                | x,-1/2-y,1/2+z           |
| C(25) --H(25) ..Cl(1)  | 0.93      | 2.28      | 3.178(10) | 162                |                          |
| C(26) --H(26) ..O(4)   | 0.93      | 2.38      | 3.296(12) | 167                | -1+x,-1/2-y,-1/2+z       |
| C(27) --H(27) ..O(6)   | 0.93      | 2.29      | 3.173(13) | 157                | 1+x,-1/2-y,1/2+z         |

**Compound 3:**

| Donor --- H...Acceptor | D – H (Å) | H...A (Å) | D...A (Å) | D - H...A (degree) | Equivalent Position Code |
|------------------------|-----------|-----------|-----------|--------------------|--------------------------|
| O(9) --H(9A) ..O(5)    | 0.88      | 2.39      | 3.189(8)  | 151                | 2-x,-1-y,-z              |
| O(9) --H(9A) ..O(6)    | 0.88      | 2.25      | 2.880(8)  | 128                | 2-x,-1-y,-z              |
| O(9) --H(9B) ..O(3)    | 0.88      | 2.51      | 2.825(7)  | 102                | -x,-1-y,-1-z             |
| O(9) --H(9B) ..O(4)    | 0.88      | 1.86      | 2.710(8)  | 161                | -x,-1-y,-1-z             |
| O(10) --H(10A) ..O(2)  | 0.85      | 2.48      | 2.842(10) | 107                |                          |
| O(10) --H(10B) ..O(8)  | 0.85      | 2.59      | 2.960(11) | 108                | 1+x,y,1+z                |
| C(6) --H(6) ..Br(1)    | 0.93      | 2.65      | 3.581(8)  | 176                |                          |
| C(9) --H(9) ..O(4)     | 0.93      | 2.42      | 3.129(11) | 133                | 1+x,-1/2-y,1/2+z         |
| C(15) --H(15) ..O(3)   | 0.93      | 2.43      | 2.753(10) | 100                |                          |
| C(21) --H(21) ..O(10)  | 0.93      | 2.50      | 3.356(12) | 154                | x,-1/2-y,-1/2+z          |
| C(25) --H(25) ..Br(2)  | 0.93      | 2.43      | 3.309(9)  | 158                |                          |
| C(26) --H(26) ..O(4)   | 0.93      | 2.37      | 3.275(11) | 164                | 1+x,-1/2-y,1/2+z         |
| C(27) --H(27) ..O(6)   | 0.93      | 2.29      | 3.147(11) | 153                | -1+x,-1/2-y,-1/2+z       |
| C(32) --H(32) ..O(7)   | 0.93      | 2.51      | 2.819(10) | 100                |                          |



**Compound 4:**

| Donor --- H....Acceptor | D – H (Å) | H...A (Å) | D...A (Å) | D - H...A (degree) | Equivalent Position Code |
|-------------------------|-----------|-----------|-----------|--------------------|--------------------------|
| O(9) --H(9A) ..O(5)     | 0.87      | 2.32      | 3.168(6)  | 164                | 1-x,-1-y,-z              |
| O(9) --H(9A) ..O(6)     | 0.87      | 2.20      | 2.883(6)  | 135                | 1-x,-1-y,-z              |
| O(9) --H(9B) ..O(4)     | 0.87      | 1.89      | 2.690(5)  | 152                | -1-x,-1-y,-1-z           |
| O(10) --H(10A) ..O(8)   | 0.85      | 2.10      | 2.936(8)  | 167                | 1+x,-1/2-y,1/2+z         |
| O(10) --H(10B) ..O(2)   | 0.85      | 2.18      | 2.835(8)  | 133                | x,-1/2-y,-1/2+z          |
| C(6) --H(6) ..Cl(1)     | 0.93      | 2.57      | 3.496(7)  | 175                |                          |
| C(9) --H(9) ..O(4)      | 0.93      | 2.45      | 3.145(8)  | 132                | 1+x,-1/2-y,1/2+z         |
| C(15) --H(15) ..O(3)    | 0.93      | 2.43      | 2.745(7)  | 100                |                          |
| C(21) --H(21) ..O(10)   | 0.93      | 2.44      | 3.305(9)  | 155                |                          |
| C(25) --H(25) ..Cl(2)   | 0.93      | 2.29      | 3.181(7)  | 161                |                          |
| C(26) --H(26) ..O(4)    | 0.93      | 2.36      | 3.272(8)  | 167                | 1+x,-1/2-y,1/2+z         |
| C(27) --H(27) ..O(6)    | 0.93      | 2.30      | 3.180(8)  | 157                | -1+x,-1/2-y,-1/2+z       |

**Compound 5:**

| Donor --- H....Acceptor | D – H (Å) | H...A (Å) | D...A (Å) | D - H...A (degree) | Equivalent Position Code |
|-------------------------|-----------|-----------|-----------|--------------------|--------------------------|
| O(9) --H(9A) ..O(5)     | 0.87      | 2.33      | 3.177(7)  | 163                | 1-x,-y,1-z               |
| O(9) --H(9A) ..O(6)     | 0.87      | 2.18      | 2.886(7)  | 138                | 1-x,-y,1-z               |
| O(9) --H(9B) ..O(4)     | 0.87      | 1.94      | 2.689(9)  | 142                | -1-x,-y,-z               |
| O(10) --H(10A) ..O(8)   | 0.85      | 2.20      | 2.952(9)  | 148                | 1+x,1/2-y,1/2+z          |
| O(10) --H(10B) ..O(2)   | 0.85      | 2.11      | 2.832(8)  | 143                | x,1/2-y,-1/2+z           |
| C(6) --H(6) ..Br(1)     | 0.93      | 2.61      | 3.542(7)  | 176                |                          |
| C(9) --H(9) ..O(4)      | 0.93      | 2.44      | 3.140(9)  | 132                | 1+x,1/2-y,1/2+z          |
| C(15) --H(15) ..O(3)    | 0.93      | 2.44      | 2.757(8)  | 100                |                          |
| C(16) --H(16) ..Br(1)   | 0.93      | 2.90      | 3.831(7)  | 177                |                          |
| C(21) --H(21) ..O(10)   | 0.93      | 2.45      | 3.316(10) | 155                |                          |
| C(25) --H(25) ..Cl(1)   | 0.93      | 2.29      | 3.184(7)  | 162                |                          |
| C(26) --H(26) ..O(4)    | 0.93      | 2.36      | 3.273(9)  | 168                | 1+x,1/2-y,1/2+z          |
| C(27) --H(27) ..O(6)    | 0.93      | 2.30      | 3.176(9)  | 156                | -1+x,1/2-y,-1/2+z        |

**Compound 6:**

| Donor --- H....Acceptor | D – H (Å) | H...A (Å) | D...A (Å) | D - H...A (degree) | Equivalent Position Code |
|-------------------------|-----------|-----------|-----------|--------------------|--------------------------|
| O(9) --H(9A) ..O(6)     | 0.87      | 2.48      | 3.124(5)  | 131                |                          |
| O(9) --H(9A) ..O(7)     | 0.87      | 2.15      | 2.964(6)  | 155                | -1/2+x,1/2-y,-1/2+z      |
| O(9) --H(9B) ..O(2)     | 0.73(5)   | 2.02(5)   | 2.724(5)  | 165(6)             |                          |
| O(10) --H(10A) ..O(8)   | 0.74(5)   | 2.01(5)   | 2.721(6)  | 160(6)             | 1-x,y,3/2-z              |
| O(10) --H(10B) ..O(1)   | 0.74(6)   | 2.14(6)   | 2.876(6)  | 179(10)            | 1/2-x,3/2-y,1-z          |
| C(8) --H(8) ..Br(1)     | 0.93      | 2.78      | 3.645(5)  | 155                |                          |
| C(10) --H(10) ..O(8)    | 0.93      | 2.47      | 3.275(7)  | 145                | 1/2-x,1/2+y,3/2-z        |
| C(16) --H(16) ..Br(1)   | 0.93      | 2.87      | 3.702(5)  | 150                |                          |
| C(23) --H(23) ..Br(1)   | 0.93      | 2.91      | 3.617(5)  | 133                |                          |
| C(25) --H(25) ..Br(1)   | 0.93      | 2.77      | 3.682(5)  | 168                |                          |
| C(27) --H(27) ..O(8)    | 0.93      | 2.51      | 3.399(6)  | 160                | 1/2-x,-1/2+y,3/2-z       |

**Compound 7:**

| Donor --- H...Acceptor | D – H (Å) | H...A (Å) | D...A (Å) | D - H...A (degree) | Equivalent Position Code |
|------------------------|-----------|-----------|-----------|--------------------|--------------------------|
| O(9) --H(9A) ..O(5)    | 0.89      | 2.30      | 3.154(10) | 161                | 4-x,1-y,2-z              |
| O(9) --H(9A) ..O(6)    | 0.89      | 2.20      | 2.898(10) | 135                | 4-x,1-y,2-z              |
| O(9) --H(9B) ..O(4)    | 0.89      | 1.87      | 2.689(8)  | 153                | 2-x,1-y,1-z              |
| O(10) --H(10B) ..O(2)  | 0.85      | 2.50      | 2.807(10) | 102                | x,3/2-y,-1/2+z           |
| C(3) --H(3) ..O(9)     | 0.93      | 2.60      | 3.347(11) | 138                | 3-x,1-y,2-z              |
| C(6) --H(6) ..Cl(1)    | 0.93      | 2.57      | 3.492(9)  | 174                |                          |
| C(9) --H(9) ..O(4)     | 0.93      | 2.47      | 3.141(18) | 129                | 1+x,3/2-y,1/2+z          |
| C(12) --H(12) ..O(10)  | 0.93      | 2.58      | 3.473(12) | 161                | -1+x,y,z                 |
| C(15) --H(15) ..O(3)   | 0.93      | 2.43      | 2.752(10) | 100                |                          |
| C(21) --H(21) ..O(10)  | 0.93      | 2.46      | 3.317(19) | 152                |                          |
| C(25) --H(25) ..Cl(2)  | 0.93      | 2.31      | 3.197(10) | 161                |                          |
| C(26) --H(26) ..O(4)   | 0.93      | 2.33      | 3.246(12) | 167                | 1+x,3/2-y,1/2+z          |
| C(27) --H(27) ..O(6)   | 0.93      | 2.25      | 3.129(13) | 157                | -1+x,3/2-y,-1/2+z        |

**Compound 8:**

| Donor --- H...Acceptor | D – H (Å) | H...A (Å) | D...A (Å) | D - H...A (degree) | Equivalent Position Code |
|------------------------|-----------|-----------|-----------|--------------------|--------------------------|
| O(9) --H(9A) ..O(5)    | 0.88      | 2.30      | 3.149(8)  | 161                | -2-x,-y,-2-z             |
| O(9) --H(9A) ..O(6)    | 0.88      | 2.18      | 2.905(8)  | 139                | -2-x,-y,-2-z             |
| O(9) --H(9B) ..O(4)    | 0.88      | 1.95      | 2.688(7)  | 141                | -x,-y,-1-z               |
| O(10) --H(10A) ..O(8)  | 0.85      | 2.49      | 2.948(9)  | 115                | -1+x,y,-1+z              |
| O(10) --H(10B) ..O(2)  | 0.85      | 2.39      | 2.810(8)  | 111                |                          |
| O(10) --H(10B) ..O(9)  | 0.85      | 2.54      | 3.383(9)  | 172                | -1-x,-y,-2-z             |
| C(6) --H(6) ..Br(1)    | 0.93      | 2.61      | 3.539(7)  | 176                |                          |
| C(9) --H(9) ..O(4)     | 0.93      | 2.42      | 3.107(10) | 131                | -1+x,1/2-y,-1/2+z        |
| C(15) --H(15) ..O(3)   | 0.93      | 2.43      | 2.753(9)  | 100                |                          |
| C(16) --H(16) ..Br(1)  | 0.93      | 2.91      | 3.843(8)  | 177                |                          |
| C(21) --H(21) ..O(10)  | 0.93      | 2.42      | 3.281(10) | 154                | x,1/2-y,1/2+z            |
| C(25) --H(25) ..Cl(1)  | 0.93      | 2.28      | 3.185(9)  | 162                |                          |
| C(26) --H(26) ..O(4)   | 0.93      | 2.36      | 3.280(10) | 168                | -1+x,1/2-y,-1/2+z        |
| C(27) --H(27) ..O(6)   | 0.93      | 2.24      | 3.120(11) | 158                | 1+x,1/2-y,1/2+z          |

Compound 9:

| Donor --- H...Acceptor | D - H (Å) | H...A (Å) | D...A (Å) | D - H...A (degree) | Equivalent Position Code |
|------------------------|-----------|-----------|-----------|--------------------|--------------------------|
| O(9) --H(9A) ..O(5)    | 0.86      | 2.36      | 3.199(10) | 165                | 2-x,1-y,2-z              |
| O(9) --H(9A) ..O(6)    | 0.86      | 2.20      | 2.885(10) | 136                | 2-x,1-y,2-z              |
| O(9) --H(9B) ..O(4)    | 0.86      | 1.95      | 2.715(9)  | 146                | -x,1-y,1-z               |
| O(10) --H(10A) ..O(2)  | 0.85      | 2.37      | 2.864(11) | 118                | x,3/2-y,-1/2+z           |
| O(10) --H(10A) ..O(8)  | 0.85      | 2.25      | 2.971(12) | 143                | 1+x,3/2-y,1/2+z          |
| O(10) --H(10B) ..O(2)  | 0.85      | 2.58      | 2.864(11) | 100                | x,3/2-y,-1/2+z           |
| C(6) --H(6) ..Br(1)    | 0.93      | 2.67      | 3.594(11) | 177                |                          |
| C(9) --H(9) ..O(4)     | 1.02(8)   | 2.44(9)   | 3.163(13) | 128(6)             | 1+x,3/2-y,1/2+z          |
| C(15) --H(15) ..O(3)   | 0.93      | 2.44      | 2.767(10) | 100                |                          |
| C(21) --H(21) ..O(10)  | 0.93      | 2.50      | 3.361(14) | 155                |                          |
| C(24) --H(24) ..O(5)   | 0.93      | 2.52      | 2.830(11) | 100                |                          |
| C(25) --H(25) ..Br(2)  | 0.93      | 2.44      | 3.326(11) | 159                |                          |
| C(26) --H(26) ..O(4)   | 0.93      | 2.38      | 3.287(12) | 165                | 1+x,3/2-y,1/2+z          |
| C(27) --H(27) ..O(6)   | 0.93      | 2.31      | 3.170(13) | 154                | -1+x,3/2-y,-1/2+z        |
